# Supplementary material
Source: publisher figshare collection journal article supplement (https://sage.figshare.com/ndownloader/files/31566777)
Supplement: Supplementary file 1 [file 31566777]

***Supplementary material: SARS-CoV-2 infection fatality rates in India:  
systematic review, meta-analysis and model-based estimation***

***Supplementary Appendices***

- A. PRISMA checklist
- B. Systematic review search procedure
- C. Summary of included articles
- D. List of excluded articles
- E. Summary of excluded articles
- F. Meta-analysis methodology
- G. Summary of excluded articles from the quantitative summary
- H. Supplementary meta-analysis and summary of seroprevalence estimates within India

- I. Risk of bias assessment across included articles
- J. Assessment of publication bias
- K. SEIR-*fansy* model framework
- L. Data source and model-based results

## Appendix A. PRISMA checklist [1]

| Section and Topic             | Item # | Checklist item                                                                                                                                                                                                                                                                                                                                                                                                                                                                                                                                                                                                                                                                                                                                                                                                                                                                                                                                                                                                                                                                                                                                                                                                                     | Location where item is reported |
|-------------------------------|--------|------------------------------------------------------------------------------------------------------------------------------------------------------------------------------------------------------------------------------------------------------------------------------------------------------------------------------------------------------------------------------------------------------------------------------------------------------------------------------------------------------------------------------------------------------------------------------------------------------------------------------------------------------------------------------------------------------------------------------------------------------------------------------------------------------------------------------------------------------------------------------------------------------------------------------------------------------------------------------------------------------------------------------------------------------------------------------------------------------------------------------------------------------------------------------------------------------------------------------------|---------------------------------|
| <b>TITLE</b>                  |        |                                                                                                                                                                                                                                                                                                                                                                                                                                                                                                                                                                                                                                                                                                                                                                                                                                                                                                                                                                                                                                                                                                                                                                                                                                    |                                 |
| Title                         | 1      | Identify the report as a systematic review.                                                                                                                                                                                                                                                                                                                                                                                                                                                                                                                                                                                                                                                                                                                                                                                                                                                                                                                                                                                                                                                                                                                                                                                        | Title Page                      |
| <b>ABSTRACT</b>               |        |                                                                                                                                                                                                                                                                                                                                                                                                                                                                                                                                                                                                                                                                                                                                                                                                                                                                                                                                                                                                                                                                                                                                                                                                                                    |                                 |
| Abstract                      | 2      | Background: Provide an explicit statement of the main objective(s) or question(s) the review addresses. Methods: Specify the inclusion and exclusion criteria for the review. Specify the information sources (e.g. databases, registers) used to identify studies and the date when each was last searched. Specify the methods used to assess risk of bias in the included studies. Specify the methods used to present and synthesise results. Results: Give the total number of included studies and participants and summarise relevant characteristics of studies. Present results for main outcomes, preferably indicating the number of included studies and participants for each. If meta-analysis was done, report the summary estimate and confidence/credible interval. If comparing groups, indicate the direction of the effect (i.e. which group is favoured). Discussion: Provide a brief summary of the limitations of the evidence included in the review (e.g. study risk of bias, inconsistency and imprecision). Provide a general interpretation of the results and important implications. Other: Specify the primary source of funding for the review. Provide the register name and registration number. | Title Page                      |
| <b>INTRODUCTION</b>           |        |                                                                                                                                                                                                                                                                                                                                                                                                                                                                                                                                                                                                                                                                                                                                                                                                                                                                                                                                                                                                                                                                                                                                                                                                                                    |                                 |
| Rationale                     | 3      | Describe the rationale for the review in the context of existing knowledge.                                                                                                                                                                                                                                                                                                                                                                                                                                                                                                                                                                                                                                                                                                                                                                                                                                                                                                                                                                                                                                                                                                                                                        | 3-6                             |
| Objectives                    | 4      | Provide an explicit statement of the objective(s) or question(s) the review addresses.                                                                                                                                                                                                                                                                                                                                                                                                                                                                                                                                                                                                                                                                                                                                                                                                                                                                                                                                                                                                                                                                                                                                             | 6                               |
| <b>METHODS</b>                |        |                                                                                                                                                                                                                                                                                                                                                                                                                                                                                                                                                                                                                                                                                                                                                                                                                                                                                                                                                                                                                                                                                                                                                                                                                                    |                                 |
| Eligibility criteria          | 5      | Specify the inclusion and exclusion criteria for the review and how studies were grouped for the syntheses.                                                                                                                                                                                                                                                                                                                                                                                                                                                                                                                                                                                                                                                                                                                                                                                                                                                                                                                                                                                                                                                                                                                        | 11-12                           |
| Information sources           | 6      | Specify all databases, registers, websites, organisations, reference lists and other sources searched or consulted to identify studies. Specify the date when each source was last searched or consulted.                                                                                                                                                                                                                                                                                                                                                                                                                                                                                                                                                                                                                                                                                                                                                                                                                                                                                                                                                                                                                          | 10-11, App B                    |
| Search strategy               | 7      | Present the full search strategies for all databases, registers and websites, including any filters and limits used.                                                                                                                                                                                                                                                                                                                                                                                                                                                                                                                                                                                                                                                                                                                                                                                                                                                                                                                                                                                                                                                                                                               | App B                           |
| Selection process             | 8      | Specify the methods used to decide whether a study met the inclusion criteria of the review, including how many reviewers screened each record and each report retrieved, whether they worked independently, and if applicable, details of automation tools used in the process.                                                                                                                                                                                                                                                                                                                                                                                                                                                                                                                                                                                                                                                                                                                                                                                                                                                                                                                                                   | 13, App B                       |
| Data collection process       | 9      | Specify the methods used to collect data from reports, including how many reviewers collected data from each report, whether they worked independently, any processes for obtaining or confirming data from study investigators, and if applicable, details of automation tools used in the process.                                                                                                                                                                                                                                                                                                                                                                                                                                                                                                                                                                                                                                                                                                                                                                                                                                                                                                                               | 13, App B                       |
| Data items                    | 10a    | List and define all outcomes for which data were sought. Specify whether all results that were compatible with each outcome domain in each study were sought (e.g. for all measures, time points, analyses), and if not, the methods used to decide which results to collect.                                                                                                                                                                                                                                                                                                                                                                                                                                                                                                                                                                                                                                                                                                                                                                                                                                                                                                                                                      | 7-10, 13                        |
|                               | 10b    | List and define all other variables for which data were sought (e.g. participant and intervention characteristics, funding sources). Describe any assumptions made about any missing or unclear information.                                                                                                                                                                                                                                                                                                                                                                                                                                                                                                                                                                                                                                                                                                                                                                                                                                                                                                                                                                                                                       | 7-10, 13                        |
| Study risk of bias assessment | 11     | Specify the methods used to assess risk of bias in the included studies, including details of the tool(s) used, how many reviewers assessed each study and whether they worked independently, and if applicable, details of automation                                                                                                                                                                                                                                                                                                                                                                                                                                                                                                                                                                                                                                                                                                                                                                                                                                                                                                                                                                                             | 15                              |

| Section and Topic             | Item # | Checklist item                                                                                                                                                                                                                                                                       | Location where item is reported |
|-------------------------------|--------|--------------------------------------------------------------------------------------------------------------------------------------------------------------------------------------------------------------------------------------------------------------------------------------|---------------------------------|
|                               |        | tools used in the process.                                                                                                                                                                                                                                                           |                                 |
| Effect measures               | 12     | Specify for each outcome the effect measure(s) (e.g. risk ratio, mean difference) used in the synthesis or presentation of results.                                                                                                                                                  | 14, App F                       |
| Synthesis methods             | 13a    | Describe the processes used to decide which studies were eligible for each synthesis (e.g. tabulating the study intervention characteristics and comparing against the planned groups for each synthesis (item #5)).                                                                 | App F, App G                    |
|                               | 13b    | Describe any methods required to prepare the data for presentation or synthesis, such as handling of missing summary statistics, or data conversions.                                                                                                                                | 14, App F, App G                |
|                               | 13c    | Describe any methods used to tabulate or visually display results of individual studies and syntheses.                                                                                                                                                                               | 13-15, App F                    |
|                               | 13d    | Describe any methods used to synthesize results and provide a rationale for the choice(s). If meta-analysis was performed, describe the model(s), method(s) to identify the presence and extent of statistical heterogeneity, and software package(s) used.                          | 13-15, App F                    |
|                               | 13e    | Describe any methods used to explore possible causes of heterogeneity among study results (e.g. subgroup analysis, meta-regression).                                                                                                                                                 | 13-15                           |
|                               | 13f    | Describe any sensitivity analyses conducted to assess robustness of the synthesized results.                                                                                                                                                                                         | 15                              |
| Reporting bias assessment     | 14     | Describe any methods used to assess risk of bias due to missing results in a synthesis (arising from reporting biases).                                                                                                                                                              | 15                              |
| Certainty assessment          | 15     | Describe any methods used to assess certainty (or confidence) in the body of evidence for an outcome.                                                                                                                                                                                | 10, 15                          |
| <b>RESULTS</b>                |        |                                                                                                                                                                                                                                                                                      |                                 |
| Study selection               | 16a    | Describe the results of the search and selection process, from the number of records identified in the search to the number of studies included in the review, ideally using a flow diagram.                                                                                         | 17-19                           |
|                               | 16b    | Cite studies that might appear to meet the inclusion criteria, but which were excluded, and explain why they were excluded.                                                                                                                                                          | 22, App D, App E, App G         |
| Study characteristics         | 17     | Cite each included study and present its characteristics.                                                                                                                                                                                                                            | 19-22                           |
| Risk of bias in studies       | 18     | Present assessments of risk of bias for each included study.                                                                                                                                                                                                                         | App I                           |
| Results of individual studies | 19     | For all outcomes, present, for each study: (a) summary statistics for each group (where appropriate) and (b) an effect estimate and its precision (e.g. confidence/credible interval), ideally using structured tables or plots.                                                     | 20, App C                       |
| Results of syntheses          | 20a    | For each synthesis, briefly summarise the characteristics and risk of bias among contributing studies.                                                                                                                                                                               | 37, App I                       |
|                               | 20b    | Present results of all statistical syntheses conducted. If meta-analysis was done, present for each the summary estimate and its precision (e.g. confidence/credible interval) and measures of statistical heterogeneity. If comparing groups, describe the direction of the effect. | 29-37                           |
|                               | 20c    | Present results of all investigations of possible causes of heterogeneity among study results.                                                                                                                                                                                       | 33-36                           |
|                               | 20d    | Present results of all sensitivity analyses conducted to assess the robustness of the synthesized results.                                                                                                                                                                           | 37-38, App H                    |
| Reporting biases              | 21     | Present assessments of risk of bias due to missing results (arising from reporting biases) for each synthesis assessed.                                                                                                                                                              | 37, App J                       |
| Certainty of evidence         | 22     | Present assessments of certainty (or confidence) in the body of evidence for each outcome assessed.                                                                                                                                                                                  | 37, App J                       |
| <b>DISCUSSION</b>             |        |                                                                                                                                                                                                                                                                                      |                                 |

| Section and Topic                              | Item # | Checklist item                                                                                                                                                                                                                             | Location where item is reported |
|------------------------------------------------|--------|--------------------------------------------------------------------------------------------------------------------------------------------------------------------------------------------------------------------------------------------|---------------------------------|
| Discussion                                     | 23a    | Provide a general interpretation of the results in the context of other evidence.                                                                                                                                                          | 42-45                           |
|                                                | 23b    | Discuss any limitations of the evidence included in the review.                                                                                                                                                                            | 45-46                           |
|                                                | 23c    | Discuss any limitations of the review processes used.                                                                                                                                                                                      | 45-46                           |
|                                                | 23d    | Discuss implications of the results for practice, policy, and future research.                                                                                                                                                             | 46-50                           |
| <b>OTHER INFORMATION</b>                       |        |                                                                                                                                                                                                                                            |                                 |
| Registration and protocol                      | 24a    | Provide registration information for the review, including register name and registration number, or state that the review was not registered.                                                                                             | NA                              |
|                                                | 24b    | Indicate where the review protocol can be accessed, or state that a protocol was not prepared.                                                                                                                                             | NA                              |
|                                                | 24c    | Describe and explain any amendments to information provided at registration or in the protocol.                                                                                                                                            | NA                              |
| Support                                        | 25     | Describe sources of financial or non-financial support for the review, and the role of the funders or sponsors in the review.                                                                                                              | Title Page                      |
| Competing interests                            | 26     | Declare any competing interests of review authors.                                                                                                                                                                                         | Title Page                      |
| Availability of data, code and other materials | 27     | Report which of the following are publicly available and where they can be found: template data collection forms; data extracted from included studies; data used for all analyses; analytic code; any other materials used in the review. | 38, App C                       |

NA = not applicable.

## ***Appendix B. Systematic review search procedure***

To conduct the present systematic review, we systematically collected publications and preprints concerning infection fatality rates (IFRs) from SARS-CoV-2 in India and neighboring countries of Bangladesh, Nepal, Pakistan, and Sri Lanka. To identify relevant papers, we searched four databases: PubMed, Embase, Global Index Medicus, and searched for preprints (encompassing bioRxiv, medRxiv, and SSRN). The search was conducted on July 3, 2021 and, as such, the results reflect published studies and preprints available from January 1, 2020 to July 3, 2021. Results were further verified through August 15, 2021 through reviewing media reports, government press releases, and manual search of preprints and publications. Data were extracted from the online search engines into the reference manager Zotero, deduplicated, and imported into Excel for screening.

The title/abstract screening, the full-text screening, and data abstraction were independently performed by two screeners to verify which studies met inclusion and exclusion criteria and to verify data collected. When the two screeners disagreed on the marking for a citation, the screeners reached a consensus on whether to advance the citation to the next level of screening. Below we publish the full search strategies for each database.

### **PubMed (National Library of Medicine)**

**Date searched:** 7/3/2021

**Number of results:** 2,940

**Date filter:** January 1, 2020 to [blank]

**Other filters applied:** None

1.

covid-19[tw] OR COVID19[tw] OR SARS-CoV-2[tw] OR SARS-CoV2[tw] OR severe acute respiratory syndrome coronavirus 2[tw] OR 2019-nCoV[tw] OR 2019nCoV[tw] OR coronavirus[tw] OR coronavirus[mh] OR covid-19[mh]

2.

india[text word] OR india[mesh] OR indian[text word] OR pakistan[text word] OR pakistani[text word] OR pakistan[mesh] OR bangladesh[text word] OR bangladeshi[text word] OR bangladesh[mesh] OR nepal[text word] OR nepal[mesh] OR "sri lanka"[text word] OR "sri lankan"[text word] OR "sri lanka"[mesh]

3.

IFR[text word] OR infection\*[text word] OR CFR[text word] OR case\*[text word] OR transmission\*[text word] OR mortalit\*[text word] OR mortality[mesh] OR fatalit\*[text word] OR lethalit\*[text word] OR death\*[text word] OR burden[text word] OR underreporting[text word] OR "under-reporting"[text word] OR seroprevalence[text word] OR serosurvey[text word] OR serology[text word] OR serology[mesh] OR seroconversion[text word] OR seroconversion[mesh] OR "serosurveillance"[text word] OR Seroepidemiologic studies[mesh] OR seroepid\*[text word] OR seropositiv\*[text word] OR antibod\*[text word] OR

antibodies[mesh] OR surveillance[text word] OR SIR[text word] OR SEIR[text word] OR  
“susceptible-exposed-infected-removed”[text word] OR “susceptible-infected-removed”[text  
word]

(1 AND 2 AND 3)

#### **Embase (Elsevier)**

**Date searched:** 7/3/2021

**Number of results:** 1,119

**Date filter:** 2020 to 2021

**Other filters applied:** Embase only and not Medline (as Medline is included in PubMed)

1.

covid-19:ti,ab,kw OR COVID19:ti,ab,kw OR SARS-CoV-2:ti,ab,kw OR SARS-CoV2:ti,ab,kw OR  
"severe acute respiratory syndrome coronavirus 2":ti,ab,kw OR 2019-nCoV:ti,ab,kw OR  
2019nCoV:ti,ab,kw OR coronavirus:ti,ab,kw OR 'Coronavirinae'/exp OR 'coronavirus disease  
2019'/exp

2.

india:ti,ab,kw OR 'india'/exp OR indian:ti,ab,kw OR pakistan:ti,ab,kw OR pakistani:ti,ab,kw  
OR 'pakistan'/exp OR bangladesh:ti,ab,kw OR bangladeshi:ti,ab,kw OR 'bangladesh'/de OR  
nepal:ti,ab,kw OR 'nepal'/de OR "sri lanka":ti,ab,kw OR "sri lankan":ti,ab,kw OR 'sri lanka'/de

3.

IFR:ti,ab,kw OR infection\*:ti,ab,kw OR CFR:ti,ab,kw OR case\*:ti,ab,kw OR  
transmission\*:ti,ab,kw OR mortalit\*:ti,ab,kw OR 'mortality'/exp OR fatalit\*:ti,ab,kw OR  
lethalit\*:ti,ab,kw OR death\*:ti,ab,kw OR burden:ti,ab,kw OR underreporting:ti,ab,kw OR  
under-reporting:ti,ab,kw OR seroprevalence:ti,ab,kw OR serosurv\*:ti,ab,kw OR  
serology:ti,ab,kw OR 'serology'/exp OR seroconversion:ti,ab,kw OR 'seroconversion'/de OR  
'Seroepidemiology'/exp OR seroepid\*:ti,ab,kw OR seropositiv\*:ti,ab,kw OR antibod\*:ti,ab,kw  
OR 'antibody'/exp OR surveillance:ti,ab,kw OR SIR:ti,ab,kw OR SEIR:ti,ab,kw OR susceptible-  
exposed-infected-removed:ti,ab,kw OR susceptible-infected-removed:ti,ab,kw

(1 AND 2 AND 3)

#### **isearch (National Library of Medicine)**

**Date searched:** 7/3/2021

**Number of results:** 1,078

**Date filter:** January 1, 2020 to [blank]

**Other filters applied:** filtered to facets bioRxiv, medRxiv, SSRN; searched through title and  
abstract.

Note: Since isearch is curated to include COVID-19 related studies only, we translated the  
PubMed concept blocks 2 and 3.

(india OR indian OR pakistan OR pakistani OR bangladesh OR bangladeshi OR nepal OR "sri lanka" OR "sri lankan") AND (IFR OR infection\* OR CFR OR case\* OR transmission\* OR mortalit\* OR fatalit\* OR lethalit\* OR death\* OR burden OR underreporting OR "under-reporting" OR seroprevalence OR serosurvey OR serology OR seroconversion OR "serosurveillance" OR seroepid\* OR seropositiv\* OR antibod\* OR surveillance OR SIR OR SEIR OR "susceptible-exposed-infected-removed" OR "susceptible-infected-removed")

### **Global Index Medicus–SEAR & EMR (World Health Organization)**

*Note:* We searched in IMSEAR (Index Medicus for the South-East Asia Region) for India, Bangladesh, Nepal, and Sri Lanka, and we searched in IMEMR (Index Medicus for the Eastern Mediterranean Region) for Pakistan.

#### **For IMSEAR:**

**Date searched:** 7/3/2021

**Number of results:** 35

**Date filter:** 2020 to [blank]

**Other filters applied:** Index filtered to "IMSEAR (South-East Asia)"; searched through title, abstract, subject.

(tw:(covid-19) OR tw:(COVID19) OR tw:(SARS-CoV-2) OR tw:(SARS-CoV2) OR tw:(“severe acute respiratory syndrome coronavirus 2”) OR tw:(2019-nCoV) OR tw:(2019nCoV) OR tw:(coronavirus)) AND (tw:(india) OR tw:(indian) OR tw:(bangladesh) OR tw:(bangladeshi) OR tw:(nepal) OR tw:(“sri lanka”) OR tw:(“sri lankan”)) AND (tw:(IFR) OR tw:(infection\*) OR tw:(CFR) OR tw:(case\*) OR tw:(transmission\*) OR tw:(mortalit\*) OR tw:(fatalit\*) OR tw:(lethalit\*) OR tw:(death\*) OR tw:(burden) OR tw:(underreporting) OR tw:(“under-reporting”) OR tw:(seroprevalence) OR tw:(serosurvey) OR tw:(serology) OR tw:(seroconversion) OR tw:(“serosurveillance”) OR tw:(seroepid\*) OR tw:(seropositiv\*) OR tw:(antibod\*) OR tw:(surveillance) OR tw:(SIR) OR tw:(SEIR) OR tw:(“susceptible-exposed-infected-removed”) OR tw:(“susceptible-infected-removed”))

#### **For IMEMR:**

**Date searched:** 7/3/2021

**Number of results:** 2

**Date filter:** 2020 to [blank]

**Other filters applied:** Index filtered to "IMEMR (Eastern Mediterranean)"; searched through title, abstract, subject.

(tw:(covid-19) OR tw:(COVID19) OR tw:(SARS-CoV-2) OR tw:(SARS-CoV2) OR tw:(“severe acute respiratory syndrome coronavirus 2”) OR tw:(2019-nCoV) OR tw:(2019nCoV) OR tw:(coronavirus)) AND (tw:(pakistan) OR tw:(pakistani)) AND (tw:(IFR) OR tw:(infection\*) OR tw:(CFR) OR tw:(case\*) OR tw:(transmission\*) OR tw:(mortalit\*) OR tw:(fatalit\*) OR tw:(lethalit\*) OR tw:(death\*) OR tw:(burden) OR tw:(underreporting) OR tw:(“under-reporting”) OR tw:(seroprevalence) OR tw:(serosurvey) OR tw:(serology) OR tw:(seroconversion) OR tw:(“serosurveillance”) OR tw:(seroepid\*) OR tw:(seropositiv\*) OR tw:(antibod\*) OR tw:(surveillance) OR tw:(SIR) OR tw:(SEIR) OR tw:(“susceptible-exposed-infected-removed”) OR tw:(“susceptible-infected-removed”))



## Appendix C. Summary of included articles

**Table 1. Summary of data abstraction from included studies.**

| <i>Location</i>                           | <i>Study Design</i>        | <i>Time Period</i> | <i>Age Criteria</i> | <i>Sample Size</i>                      | <i>Descriptive Statistics</i>                                     | <i>IFR Estimate (95% CI):<sup>a</sup></i> | <i>Prevalence Estimate % (95% CI):<sup>a</sup></i>                                                                                                                                                                                                                                                                                                              | <i>Reference</i>  |
|-------------------------------------------|----------------------------|--------------------|---------------------|-----------------------------------------|-------------------------------------------------------------------|-------------------------------------------|-----------------------------------------------------------------------------------------------------------------------------------------------------------------------------------------------------------------------------------------------------------------------------------------------------------------------------------------------------------------|-------------------|
| IND–Ahmedabad, Gujarat                    | cross-sectional serosurvey | Aug 2020           | none                | N=3973<br>non-response rate: <i>N/A</i> | 48.1% female and 51.8% male<br>mean age: 37.5 ( $\pm$ 15.9) years | <i>N/A</i>                                | Overall: 31.92 (30.48–33.38)<br>Age 0–9: 34.69 (21.67–49.64)<br>Age 10–19: 31.66 (27.18–36.51)<br>Age 20–29: 26.63 (23.98–29.47)<br>Age 30–39: 31.98 (29.04–35.08)<br>Age 40–49: 32.58 (29.23–36.12)<br>Age 50–59: 35.55 (31.34–39.99)<br>Age 60–69: 36.10 (30.98–41.56)<br>Age 70–79: 44.72 (35.75–53.94)<br>Age 80–89: 40.91 (20.71–63.65)<br>Age 90–99: 0.00 | Prakash, 2021 [2] |
| IND–Bangalore Rural District of Karnataka | cross-sectional serosurvey | 2–22 Oct 2020      | age $\geq$ 18       | N=509<br>non-response rate: <i>N/A</i>  | 47.7% female and 52.3% male<br>mean age: 47.0 ( $\pm$ 16.4) years | 0.13% (i.e. 12.8 deaths per 10,000 cases) | <i>Adjusting for test sensitivity and specificity</i><br>Overall: 6.1 (4.02–8.17)<br><i>Unadjusted</i><br>Overall: 12.4 (9.6–15.6)                                                                                                                                                                                                                              | Inbaraj, 2021 [3] |

|                                                                                 |                                          |                           |        |                                                                         |                                     |     |                                                                                                                                                                                                                                                                                                                               |                       |
|---------------------------------------------------------------------------------|------------------------------------------|---------------------------|--------|-------------------------------------------------------------------------|-------------------------------------|-----|-------------------------------------------------------------------------------------------------------------------------------------------------------------------------------------------------------------------------------------------------------------------------------------------------------------------------------|-----------------------|
|                                                                                 |                                          |                           |        |                                                                         |                                     |     | Female: 12.0 (8.8–17.6)<br>Male: 12.0 (8.4–16.6)<br>Age ≤20: 5.6 (0.1–27.3)<br>Age 21–40: 13.6 (8.9–19.5)<br>Age 41–60: 12.5 (8.3–17.8)<br>Age >60: 11.3 (6.0–18.9)                                                                                                                                                           |                       |
| IND–<br>Bhubaneswar,<br>Berhampur,<br>Rourkela cities<br>of Odisha <sup>1</sup> | cross-sectional<br>serosurvey            | Aug 2020                  | age≥18 | N=4146<br>non-response<br>rate: 27.6% for<br>females 12.4%<br>for males | mean age:<br>44.2 (± 14.2)<br>years | N/A | <i>Across Three Cities</i><br>Overall: 20.30 (19.0–21.56)<br>Female: 22.79 (20.73–24.96)<br>Male: 18.81 (17.33–20.37)<br>Age <20: 17.09 (10.76–25.15)<br>Age 20–29: 18.75 (15.68–22.13)<br>Age 30–39: 21.83 (19.16–24.69)<br>Age 40–49: 19.68 (17.29–22.25)<br>Age 50–59: 18.50 (15.89–21.34)<br>Age ≥60: 23.21 (20.14–26.52) | Kshatri, 2021a<br>[4] |
| IND–<br>Bhubaneswar,<br>Odisha <sup>1</sup>                                     | serial cross-<br>sectional<br>serosurvey | Jul, Aug,<br>Sept<br>2020 | age≥18 | N=3693<br>non-response<br>rate: 18.33%<br>(across the<br>three rounds)  | mean age:<br>43.1 (± 13.9)<br>years | N/A | <i>Round 1   Round 2  <br/>Round 3</i><br>Overall: 1.58 (0.88–2.58)<br>  5.23 (4.09–6.57)  <br>48.61 (45.96–51.26)                                                                                                                                                                                                            | Kshatri, 2021b<br>[5] |

|                            |                               |                  |        |                                                                                         |                                                                                          |     |                                                                                                                                                                                                                                                                                                                                                                                                                                                                                                                                                             |                           |
|----------------------------|-------------------------------|------------------|--------|-----------------------------------------------------------------------------------------|------------------------------------------------------------------------------------------|-----|-------------------------------------------------------------------------------------------------------------------------------------------------------------------------------------------------------------------------------------------------------------------------------------------------------------------------------------------------------------------------------------------------------------------------------------------------------------------------------------------------------------------------------------------------------------|---------------------------|
|                            |                               |                  |        |                                                                                         |                                                                                          |     | Female: 1.29 (0.27–3.72)<br>  5.37 (3.44–7.95)   50.12<br>(45.24–54.99)<br>Male: 1.67 (0.87–2.90)  <br>5.16 (3.80–6.83)   47.96<br>(44.79–51.14)<br>Age 18–29: 1.61 (0.33–<br>4.64)   5.80 (3.35–9.24)  <br>42.74 (36.31–49.34)<br>Age 30–39: 0.56 (0.01–<br>3.07)   7.72 (4.96–11.36)<br>  54.02 (48.30–59.65)<br>Age 40–49: 1.30 (0.27–<br>3.76)   2.57 (1.12–5.01)  <br>51.71 (46.75–56.63)<br>Age 50–59: 2.82 (0.92–<br>6.47)   3.49 (1.61–6.52)  <br>49.12 (43.15–55.10)<br>Age ≥60: 1.68 (0.35–<br>4.82)   7.39 (3.99–12.30)<br>  38.18 (30.73–46.05) |                           |
| IND–Chennai,<br>Tamil Nadu | cross-sectional<br>serosurvey | 7–14 Jul<br>2020 | age≥10 | N=12,405<br>non-response<br>rate: N/A<br>(17.7% not<br>available,13.5%<br>refusal rate) | 52.7% female,<br>47% male,<br>0.3%<br>transgender<br>mean age:<br>41.1 (± 17.3)<br>years | N/A | <i>Weighted and test<br/>performance adjusted</i><br>Overall: 18.4 (14.8–22.6)<br>Female: 20.3 (16.4–25.0)<br>Male: 16.3 (12.9–20.3)<br>Transgender: 2.4 (0.0–<br>27.3)<br>Age 10–19: 18.6 (14.4–<br>23.7)<br>Age 20–29: 20.8 (16.5–<br>25.9)                                                                                                                                                                                                                                                                                                               | Selvaraju,<br>2021<br>[6] |

|                         |                                             |                                  |                                          |                                                                       |                                              |                                                                                                                                                                                                                            |                                                                                                                       |                                |
|-------------------------|---------------------------------------------|----------------------------------|------------------------------------------|-----------------------------------------------------------------------|----------------------------------------------|----------------------------------------------------------------------------------------------------------------------------------------------------------------------------------------------------------------------------|-----------------------------------------------------------------------------------------------------------------------|--------------------------------|
|                         |                                             |                                  |                                          |                                                                       |                                              |                                                                                                                                                                                                                            | Age 30–39: 18.2 (14.3–22.8)<br>Age 40–49: 19.3 (15.2–24.2)<br>Age 50–59: 20.1 (15.8–25.2)<br>Age ≥60: 13.1 (9.9–17.1) |                                |
| IND–Chennai, Tamil Nadu | analysis of seroprevalence & mortality data | Jul, Oct, Nov 2020               | age≥10 (Jul), age≥18 (Oct), age≥18 (Nov) | N=12,405 (Jul), N= (Oct), N=26,135 (Nov)<br>non-response rate: N/A    | N/A                                          | <i>Adjusting for death undercounting</i><br>range: 0.27–0.33% (Jul), 0.30–0.28% (Oct), 0.22–0.25% (Nov)<br><br><i>Not adjusting for death undercounting</i><br>range: 0.16–0.20% (Jul), 0.16–0.16% (Oct), 0.13–0.13% (Nov) | N/A                                                                                                                   | Banaji, 2021 [7]               |
| IND–Delhi <sup>2</sup>  | cross-sectional serosurvey                  | 15–23 January 2021               | age≥5                                    | N=28,000<br>non-response rate: N/A                                    | N/A                                          | N/A                                                                                                                                                                                                                        | Overall: 56.1%                                                                                                        | <i>Other</i> <sup>b</sup> [8]  |
| IND–Delhi               | repeated cross-sectional serosurvey         | 1–7 Aug, 1–7 Sep, 15–21 Oct 2020 | age≥5                                    | N=15,046 (Aug); N=17409 (Sep) N=15015 (Oct)<br>non-response rate: 10% | 52.5% female and 47.4% male<br>mean age: N/A | Aug: 0.77% (0.75–0.79) to 0.79% (0.76–0.81)<br>Sep: 0.98% (0.95–1.01) to 1.03% (1.00–1.06)<br>Oct: 1.27% (1.24–1.31) to 1.34% (1.31–1.38)                                                                                  | <i>Round 1   Round 2   Round 3</i><br>Overall: 28.39 (27.65–29.14)   24.08 (23.43–24.74)   24.71 (24.01–25.42)        | Sharma, 2020 [9]               |
| IND–Delhi <sup>2</sup>  | cross-sectional serosurvey                  | 27 Jun–10 July 2020              | age≥5                                    | N=21,387<br>non-response rate: N/A                                    | N/A                                          | N/A                                                                                                                                                                                                                        | Overall: 22.86%                                                                                                       | <i>Other</i> <sup>c</sup> [10] |
| IND–Delhi <sup>2</sup>  | compartmental epidemiologic model           | As of 23 Jan 2021                | none                                     | N/A                                                                   | N/A                                          | <i>Adjusting for death undercounting</i><br>range: 0.4–0.5%                                                                                                                                                                | N/A                                                                                                                   | Bhattacharyya, 2021 [11]       |

|                                                                                      |                                   |                        |        |                                    |                                                                                                                                    |                                                                                    |                                                                                                                                                                                                                                                                           |                    |
|--------------------------------------------------------------------------------------|-----------------------------------|------------------------|--------|------------------------------------|------------------------------------------------------------------------------------------------------------------------------------|------------------------------------------------------------------------------------|---------------------------------------------------------------------------------------------------------------------------------------------------------------------------------------------------------------------------------------------------------------------------|--------------------|
| IND–Delhi, Mumbai, Pune, Bengaluru, Chennai <sup>2</sup>                             | compartmental epidemiologic model | 1 Mar 2020–15 Feb 2021 | none   | N/A                                | N/A                                                                                                                                | Bengaluru: 0.05%<br>Chennai: 0.052%<br>Delhi: 0.1%<br>Mumbai: 0.15%<br>Pune: 0.17% | N/A                                                                                                                                                                                                                                                                       | Hazra, 2021 [12]   |
| IND–Delhi urban, Delhi rural, Bhubaneswar rural, Agartala rural, and Gorakhpur rural | prospective serosurvey            | 15 Mar–10 Jun 2021     | age≥2  | N=4509<br>non-response rate: N/A   | mean age: N/A (median age was 11 for Delhi urban, 12 for Delhi rural, 11 for Bhubaneswar, 13 for Gorakhpur, 14 years for Agartala) | N/A                                                                                | Overall: 65.9 (64.6–67.4)<br>Age <18: 59.0 (55.4–62.6)<br>Age ≥18: 67.3 (65.8–68.8)<br><i>Rural</i><br>Overall: 62.2 (60.7–63.9)<br>Age <18: 55.9 (52.0–59.9)<br>Age ≥18: 63.5 (61.8–65.3)<br><i>Urban</i><br>Overall: 79.1 (76.5–81.6)<br>Age <18: 78.3<br>Age ≥18: 79.2 | Misra, 2021 [13]   |
| IND–Devarajeevana Halli slum in Bengaluru, Karnataka <sup>1</sup>                    | cross-sectional serosurvey        | Sep 2020               | age≥18 | N=499<br>non-response rate: N/A    | 74.3% female and 25.7% male<br>mean age: 39.7 (± 14.5) years                                                                       | 2.94 per 10,000 cases                                                              | <i>Slum</i><br>Overall: 57.9 (53.4–62.3)<br>Age ≤20: 52.8 (35.5–69.6)<br>Age 21–40: 57.9 (51.5–64.0)<br>Age 41–60: 59.9 (52.0–67.4)<br>Age >60: 54.8 (38.7–70.2)                                                                                                          | George, 2021 [14]  |
| IND–Karnataka                                                                        | cross-sectional serosurvey        | 15 Jun–29 Aug 2020     | none   | N=1408<br>non-response rate: 34.5% | N/A                                                                                                                                | N/A                                                                                | Overall: 46.7 (43.3–50.0)<br>Rural: 44.1 (40.0–48.2)<br>Urban: 53.8 (48.4–59.2)                                                                                                                                                                                           | Mohanan, 2020 [15] |

|                                                        |                                            |                                                                                     |        |                                                    |                                                  |                                                                                                                                                                                                                                                                                                                                                                                   |                                                                                                                                                                                                                                    |                 |
|--------------------------------------------------------|--------------------------------------------|-------------------------------------------------------------------------------------|--------|----------------------------------------------------|--------------------------------------------------|-----------------------------------------------------------------------------------------------------------------------------------------------------------------------------------------------------------------------------------------------------------------------------------------------------------------------------------------------------------------------------------|------------------------------------------------------------------------------------------------------------------------------------------------------------------------------------------------------------------------------------|-----------------|
| IND–Karnataka                                          | cross-sectional serosurvey                 | 3–16 Sep 2020                                                                       | age≥18 | N=16,416 non-response rate: <i>N/A</i>             | 48.7% female and 51.2% male mean age: <i>N/A</i> | 0.05%                                                                                                                                                                                                                                                                                                                                                                             | Overall: 27.7 (26.1–29.3)<br>Female: 21.9 (19.9–23.8)<br>Male: 29.8 (27.7–31.8)<br>Age 18–29: 19 (16.8–21.3)<br>Age 30–39: 25.7 (22.7–28.7)<br>Age 40–49: 29.3 (25.6–33)<br>Age 50–59: 33.3 (28.9–37.7)<br>Age ≥60: 31.6 (28.1–35) | Babu, 2021 [16] |
| IND–Karnataka, Mumbai, and among (male) Bihar migrants | matching serosurvey to administrative data | 15 Jun–29 Aug 2020 (Karn.) 29 June–19 July 2020 (Mumbai) 4 May–21 July 2020 (Bihar) | age≥10 | N=1196 (Karn.)<br>N=6904 (Mumb.)<br>N=4362 (Bihar) | 35% female and 65% male mean age: <i>N/A</i>     | <i>Karnataka</i><br>Male age 10-49: 0.009% (0.007, 0.010)<br>Male age 50-89: 0.120% (0.090, 0.150)<br>Female age 10-49: 0.004% (0.004, 0.005)<br>Female age 50-89: 0.056% (0.043, 0.069)<br><i>Mumbai</i><br>Male age 10-49: 0.033% (0.032, 0.034)<br>Male age 50-89: 0.530% (0.516, 0.544)<br>Female age 10-49: 0.016% (0.016, 0.017)<br>Female age 50-89: 0.285% (0.277, 0.293) | <i>N/A</i>                                                                                                                                                                                                                         | Cai, 2021 [17]  |
| IND–Kashmir                                            | cross-sectional serosurvey                 | 17 Oct–4 Nov 2020                                                                   | age≥18 | N=6230 non-response rate: <i>N/A</i>               | 49.8% female and 50.2% male mean age: <i>N/A</i> | 342.1 (320.2–366.0) deaths per million cases                                                                                                                                                                                                                                                                                                                                      | <i>Weighted and adjusted for test performance</i><br>Overall: 36.7 (34.3–39.2)<br>Female: 37.6 (34.3–41.1)<br>Male: 35.9 (33.3–38.7)                                                                                               | Khan, 2021 [18] |

|                                      |                            |                      |            |                                           |                                                     |                       |                                                                                                                                                                                                                                         |                                |
|--------------------------------------|----------------------------|----------------------|------------|-------------------------------------------|-----------------------------------------------------|-----------------------|-----------------------------------------------------------------------------------------------------------------------------------------------------------------------------------------------------------------------------------------|--------------------------------|
|                                      |                            |                      |            |                                           |                                                     |                       | Age 18–29: 33.5 (29.8–37.4)<br>Age 30–49: 36.1 (33.3–39.1)<br>Age 50–69: 42.3 (38.6–46.0)<br>Age ≥70: 45.1 (37.6–52.8)<br>Urban: 40.0 (36.1–43.9)<br>Rural: 35.3 (32.2–38.5)                                                            |                                |
| IND–Indore, Madhya Pradesh           | cross-sectional serosurvey | 11–23 Aug 2020       | age≥1      | N=7103<br>non-response rate: <i>N/A</i>   | 48.1% female and 51.8% male<br>mean age: <i>N/A</i> | 1 death per 579 cases | Overall: 7.75 (7.14–8.36)<br>Female: 7.57 (6.70–8.44)<br>Male: 7.91 (7.06–8.76)<br>Age <18: 7.26 (6.24–8.28)<br>Age ≥18: 7.97 (7.21–8.74)<br>Age 18–45: 7.11 (6.22–8.01)<br>Age 45–60: 10.04 (8.28–11.80)<br>Age >60: 8.40 (5.87–10.92) | Sakalle, 2021 [19]             |
| IND–Mumbai, Maharashtra <sup>2</sup> | cross-sectional serosurvey | Mar 2021             | <i>N/A</i> | N=10,197<br>non-response rate: <i>N/A</i> | <i>N/A</i>                                          | <i>N/A</i>            | Overall: 36.3%<br>Female: 37.12%<br>Male: 35.02%<br>Non-slum: 28.5%<br>Slum: 41.6%                                                                                                                                                      | <i>Other</i> <sup>d</sup> [19] |
| IND–Mumbai, Maharashtra              | cross-sectional serosurvey | Aug 2020 (last half) | age≥12     | N=5200<br>non-response rate: <i>N/A</i>   | 44.6% female and 55.3% male<br>mean age: <i>N/A</i> | <i>N/A</i>            | <i>Non-slum</i><br>Overall: 17.1% (15.5–18.7)<br>Age 12–24: 18.5% (13.5–23.4)                                                                                                                                                           | <i>Other</i> <sup>e</sup> [21] |

|                         |                            |                    |        |                                         |                                                     |                                                    |                                                                                                                                                                                                                                                                                  |                   |
|-------------------------|----------------------------|--------------------|--------|-----------------------------------------|-----------------------------------------------------|----------------------------------------------------|----------------------------------------------------------------------------------------------------------------------------------------------------------------------------------------------------------------------------------------------------------------------------------|-------------------|
|                         |                            |                    |        |                                         |                                                     |                                                    | Age 25–40: 16.6% (13.7–19.5)<br>Age 41–60: 18.6% (16.1–21.0)<br>Age >60: 13.2% (9.6–16.7)<br><i>Slum</i><br>Overall: 45.3% (43.5–44.70)<br>Age 12–24: 40.8% (37.0–44.6)<br>Age 25–40: 42.4% (39.5–45.3)<br>Age 41–60: 50.3% (47.3–53.3)<br>Age >60: 48.2% (41.7–54.7)            |                   |
| IND–Mumbai, Maharashtra | cross-sectional serosurvey | 29 Jun–19 Jul 2020 | age≥12 | N=6904<br>non-response rate: <i>N/A</i> | 44.6% female and 55.3% male<br>mean age: <i>N/A</i> | Overall: 0.12%<br>Slum: 0.076%<br>Non-slum: 0.263% | <i>Non-slum</i><br>Overall: 17.3 (16.0–18.7)<br>Matunga: 19.2 (17.0–21.4)<br>Chembur West: 17.9 (15.6–20.3)<br>Dahisar: 12.8 (10.2–15.4)<br><i>Slum</i><br>Overall: 58.4 (56.8–59.9)<br>Matunga: 61.7 (59.6–63.8)<br>Chembur West: 59.4 (57.0–61.8)<br>Dahisar: 54.9 (50.7–59.1) | Malani, 2020 [22] |



|                         |                                             |                        |        |                                           |                                                              |                                                                                                                                                                                        |                                                                                                                                                                                                                                                                                                        |                               |
|-------------------------|---------------------------------------------|------------------------|--------|-------------------------------------------|--------------------------------------------------------------|----------------------------------------------------------------------------------------------------------------------------------------------------------------------------------------|--------------------------------------------------------------------------------------------------------------------------------------------------------------------------------------------------------------------------------------------------------------------------------------------------------|-------------------------------|
| IND–Mumbai, Maharashtra | analysis of seroprevalence & mortality data | 29 Jun–19 Jul 2020     | age≥12 | N=6904<br>non-response rate: <i>N/A</i>   | 44.6% female and 55.3% male<br>mean age: <i>N/A</i>          | <i>Adjusting for death undercounting</i><br>Overall: 0.23% (0.15–0.33)<br><br><i>Not adjusting for death undercounting</i><br>Slum: 0.084% (0.068–0.10)<br>Non-slum: 0.29% (0.22–0.38) | <i>N/A</i>                                                                                                                                                                                                                                                                                             | Banaji, 2021 [23]             |
| IND–nationwide          | Fourth cross-sectional survey               | 14 June–6 July 2021    | age≥6  | N=28,975<br>non-response rate: <i>N/A</i> | <i>N/A</i>                                                   | <i>N/A</i>                                                                                                                                                                             | Overall: 67.6% (66.4–68.7)<br>Female: 69.2% (67.9–70.5)<br>Male: 65.8% (64.4–67.1)<br>Age 6–9: 57.2% (55.0–59.4)<br>Age 10–17: 61.6% (59.8–63.3)<br>Age 18–44: 66.7% (65.3–68.0)<br>Age 45–60: 77.6% (76.1–79.0)<br>Age >60: 76.7% (74.6–78.7)<br>Rural: 66.7% (65.4–68.1)<br>Urban: 69.6% (67.5–71.7) | <i>Other<sup>f</sup></i> [24] |
| IND–nationwide          | Third cross-sectional survey                | 18 Dec 2020–6 Jan 2021 | age≥10 | N=28,598<br>non-response rate: <i>N/A</i> | 51.6% female and 48.4% male<br>mean age: 38.2 (± 16.4) years | <i>N/A</i>                                                                                                                                                                             | Overall: 24.1 (23.0–25.3)<br>Female: 24.9 (23.7–26.3)<br>Male: 23.2 (22.1–24.5)<br>Age 10–17: 27.2 (24.9–29.4)<br>Age 18–44: 22.2 (21.1–23.4)                                                                                                                                                          | Murhekar, 2021 [25]           |

|                    |                                      |                           |        |                                                                        |                                                                          |                                                                                     |                                                                                                                                                                                                                                                                                                                                                         |                           |
|--------------------|--------------------------------------|---------------------------|--------|------------------------------------------------------------------------|--------------------------------------------------------------------------|-------------------------------------------------------------------------------------|---------------------------------------------------------------------------------------------------------------------------------------------------------------------------------------------------------------------------------------------------------------------------------------------------------------------------------------------------------|---------------------------|
|                    |                                      |                           |        |                                                                        |                                                                          |                                                                                     | Age 45–60: 26.7 (25.2–28.2)<br>Age >60: 26.3 (24.3–28.3)<br>Rural: 21.4 (20.3–22.6)<br>Urban non-slum: 29.5 (27.0–32.1)<br>Urban slum: 34.7 (31.2–38.5)                                                                                                                                                                                                 |                           |
| IND–<br>nationwide | Second cross-<br>sectional<br>survey | 18 Aug–<br>20 Sep<br>2020 | age≥10 | N=29,082<br>non-response<br>rate: 17%                                  | 48.8% female<br>and 51.2%<br>male<br>mean age:<br>37.0 (± 16.4)<br>years | 0.09–0.11%<br>9.43 (8.41–10.73) to 10.65<br>(9.50–12.12) deaths per<br>10,000 cases | Overall: 6.6 (5.8–7.4)<br>Female: 6.5 (5.7–7.3)<br>Male: 6.7 (5.9–7.5)<br>Age 10–17: 5.4 (4.5–6.4)<br>Age 18–44: 6.9 (6.1–7.7)<br>Age 45–60: 6.5 (5.7–7.5)<br>Age >60: 6.2 (5.2–7.3)<br>Rural: 5.2 (4.6–6.0)<br>Urban non-slum: 9.0<br>(7.1–11.3)<br>Urban slum: 16.9 (12.9–21.7)<br><br><i>Randomly generated<br/>sample</i><br>Overall: 7.1 (6.2–8.2) | Murhekar,<br>2021<br>[26] |
| IND–<br>nationwide | First<br>cross-sectional<br>survey   | 11 May–4<br>Jun 2020      | age≥18 | N=28,000<br>non-response<br>rate: N/A<br>(86.9–95.9%<br>across strata) | 51.5% female<br>and 48.4%<br>male<br>mean age:<br>45.3 (± 15.2)<br>years | 11.72 (7.21–19.19) to<br>15.04 (9.26–24.62) deaths<br>per 10,000 cases              | Overall: 0.73 (0.34–1.13)                                                                                                                                                                                                                                                                                                                               | Murhekar,<br>2020<br>[27] |
| IND–<br>nationwide | analysis of<br>seroprevalence        | 31 Mar<br>2020            | none   | N/A                                                                    | N/A                                                                      | 0.41%                                                                               | N/A                                                                                                                                                                                                                                                                                                                                                     | Bommer, 2020<br>[27]      |

|                                                                                                                                                                                                                                                                                    | & mortality<br>data                     |                                                                             |      |     |     |                                                                                                                                                                                                                                                                                                                                                                                                                                                                                                                                                                                                                                                                                                                                                   |     |                              |
|------------------------------------------------------------------------------------------------------------------------------------------------------------------------------------------------------------------------------------------------------------------------------------|-----------------------------------------|-----------------------------------------------------------------------------|------|-----|-----|---------------------------------------------------------------------------------------------------------------------------------------------------------------------------------------------------------------------------------------------------------------------------------------------------------------------------------------------------------------------------------------------------------------------------------------------------------------------------------------------------------------------------------------------------------------------------------------------------------------------------------------------------------------------------------------------------------------------------------------------------|-----|------------------------------|
| IND–<br>nationwide<br>IND– Andhra<br>Pradesh,<br>Assam, Bihar,<br>Delhi, Goa,<br>Gujarat,<br>Haryana,<br>Jharkhand,<br>Karnataka,<br>Kerala,<br>Madhya<br>Pradesh,<br>Maharashtra,<br>Odisha,<br>Punjab,<br>Rajasthan,<br>Tamil Nadu,<br>Telangana,<br>Uttarakhand,<br>West Bengal | compartmental<br>epidemiologic<br>model | Wave 1<br>1 Apr<br>2020-31<br>Jan 2021<br>Wave 2<br>1 Feb-15<br>May<br>2021 | none | N/A | N/A | IFR1   IFR2<br>Wave 1<br>India: 0.129% (0.125–<br>0.134)   0.461% (0.455–<br>0.468)<br>Maharashtra: 0.460 (0.444-<br>0.480)   0.968 (0.955-<br>0.985)<br>Punjab: 0.362 (0.331-<br>0.397)   1.010 (0.991-<br>1.031)<br>West Bengal: 0.322 (0.289-<br>0.357)   0.675 (0.665-<br>0.686)<br>Gujarat: 0.284 (0.267-<br>0.302)   0.592 (0.579-<br>0.606)<br>Tamil Nadu: 0.226 (0.210-<br>0.243)   0.514 (0.504-<br>0.523)<br>Karnataka: 0.207 (0.199-<br>0.216)   0.505 (0.499-<br>0.511)<br>Rajasthan: 0.168 (0.153-<br>0.186)   0.428 (0.415-<br>0.443)<br>Madhya Pradesh: 0.163<br>(0.154-0.173)   0.328<br>(0.319-0.338)<br>Haryana: 0.148 (0.131-<br>0.172)   0.428 (0.411-<br>0.453)<br>Odisha: 0.137 (0.117-<br>0.160)   0.351 (0.333-<br>0.367) | N/A | Purkayastha,<br>2021<br>[29] |

Jharkhand: 0.122 (0.094-0.156) | 0.238 (0.226-0.252)  
Telangana: 0.099 (0.065-0.165) | 0.261 (0.250-0.273)  
Bihar: 0.086 (0.073-0.103) | 0.204 (0.191-0.219)  
Uttarakhand: 0.078 (0.062-0.104) | 0.404 (0.390-0.426)  
Assam: 0.069 (0.060-0.081) | 0.168 (0.160-0.177)  
Kerala: 0.061 (0.057-0.067) | 0.144 (0.140-0.148)  
Delhi: 0.060 (0.060-0.061) | 0.380 (0.377-0.383)  
Goa: 0.051 (0.049-0.053) | 0.320 (0.311-0.329)  
Andhra Pradesh: 0.019 (0.019-0.019) | 0.168 (0.167-0.170)  
*Wave 2*  
India, wave 2: 0.032 (0.029-0.035) | 0.183 (0.180-0.186)  
India, across waves 1 and 2: 0.06 | 0.24  
Goa: 0.102 (0.101-0.103) | 0.393 (0.382-0.405)  
Delhi: 0.081 (0.080-0.081) | 0.298 (0.295-0.301)  
Punjab: 0.049 (0.045-0.056) | 0.397 (0.390-0.404)  
Assam: 0.047 (0.037-0.065) | 0.221 (0.209-0.240)

Maharashtra: 0.047 (0.046-0.049) | 0.209 (0.207-0.211)  
Uttarakhand: 0.045 (0.044-0.048) | 0.387 (0.381-0.393)  
Uttar Pradesh: 0.026 (0.023-0.030) | 0.166 (0.163-0.170)  
Rajasthan: 0.024 (0.019-0.029) | 0.173 (0.168-0.179)  
Karnataka: 0.022 (0.022-0.023) | 0.201 (0.199-0.203)  
West Bengal: 0.022 (0.019-0.026) | 0.105 (0.102-0.109)  
Tamil Nadu: 0.021 (0.020-0.022) | 0.131 (0.130-0.133)  
Gujarat: 0.020 (0.017-0.023) | 0.188 (0.185-0.192)  
Haryana: 0.019 (0.019-0.020) | 0.159 (0.157-0.161)  
Jharkhand: 0.017 (0.016-0.018) | 0.311 (0.308-0.314)  
Madhya Pradesh: 0.015 (0.013-0.016) | 0.132 (0.130-0.134)  
Andhra Pradesh: 0.013 (0.012-0.014) | 0.093 (0.091-0.095)  
Kerala: 0.012 (0.012-0.012) | 0.056 (0.055-0.056)

|                                                       |                                                     |                                                            |                                          |                                                                              |                                                                                                                              |                                                                                                                                                               |                                                                                                                                                                                                              |                     |
|-------------------------------------------------------|-----------------------------------------------------|------------------------------------------------------------|------------------------------------------|------------------------------------------------------------------------------|------------------------------------------------------------------------------------------------------------------------------|---------------------------------------------------------------------------------------------------------------------------------------------------------------|--------------------------------------------------------------------------------------------------------------------------------------------------------------------------------------------------------------|---------------------|
|                                                       |                                                     |                                                            |                                          |                                                                              |                                                                                                                              | Telangana: 0.011 (0.009-0.013)   0.110 (0.108-0.113)<br>Bihar: 0.005 (0.005-0.006)   0.103 (0.102-0.105)<br>Odisha: 0.002 (0.002-0.002)   0.028 (0.028-0.029) |                                                                                                                                                                                                              |                     |
| IND–nationwide<br>IND–Delhi                           | Bayesian model with seroprevalence & mortality data | 11 May –4 Jun 2020 (overall India) 1–7 August 2020 (Delhi) | age≥18 for overall India age≥5 for Delhi | 28,000 (India) N=15,046 (Delhi); non-response rate: N/A (India); 10% (Delhi) | 51.5% female and 48.4% male (India) 52.5% female and 47.4% male (Delhi); mean age: 45.3 (SD 15.2) years (India); N/A (Delhi) | <i>Adjusting for death undercounting:</i><br>For overall India: 0.29% (0.06–0.58)<br>For Delhi: 0.17% (0.07–0.40)                                             | <i>For overall India</i><br>0.7% (0.4–1.1)<br><i>For Delhi</i><br>28.4% (27.6–29.1)                                                                                                                          | Campbell, 2021 [30] |
| IND–nationwide<br>IND–Delhi, Maharashtra <sup>2</sup> | compartmental epidemiologic model                   | As of 1 Sep 2020                                           | none                                     | N/A                                                                          | N/A                                                                                                                          | <i>Adjusting for death undercounting</i><br>India: 0.91%<br>Delhi: 0.91%<br>Maharashtra: 1.24%                                                                | N/A                                                                                                                                                                                                          | Bhaduri, 2020 [31]  |
| IND–Pimpri-Chinchwad, Maharashtra <sup>1</sup>        | cross-sectional survey                              | 7–17 Oct 2020                                              | age≥12                                   | N=5000 non-response rate: 10%                                                | N/A                                                                                                                          | 0.17%                                                                                                                                                         | Overall: 34.04 (31.3–36.8)<br>Female: 36.6 (33.7–39.5)<br>Male: 31.0 (28.0–34.1)<br>Age 12–17: 37.6 (31.2–44.0)<br>Age 18–30: 31.9 (28.8–35.0)<br>Age 31–50: 33.8 (30.3–37.3)<br>Age 51–65: 38.2 (33.6–42.9) | Banerjee, 2020 [32] |

|                                                                                                                                                                                  |                                               |                                      |        |                                                                                    |                                        |                                                                                                                                                                                                                                                                                                                                          |                                                                                                                                                                                                                                |                 |
|----------------------------------------------------------------------------------------------------------------------------------------------------------------------------------|-----------------------------------------------|--------------------------------------|--------|------------------------------------------------------------------------------------|----------------------------------------|------------------------------------------------------------------------------------------------------------------------------------------------------------------------------------------------------------------------------------------------------------------------------------------------------------------------------------------|--------------------------------------------------------------------------------------------------------------------------------------------------------------------------------------------------------------------------------|-----------------|
|                                                                                                                                                                                  |                                               |                                      |        |                                                                                    |                                        |                                                                                                                                                                                                                                                                                                                                          | Age >65: 30.6 (24.4–36.8)<br>Slum: 40.9 (37.0–44.7)<br>Tenement: 41.2 (37.7–44.8)<br>Housing: 29.8 (25.8–33.8)                                                                                                                 |                 |
| IND–nationwide<br>IND– Andhra Pradesh, Delhi, Gujarat, Haryana, Jammu & Kashmir, Karnataka, Kerala, Madhya Pradesh, Maharashtra, Rajasthan, Tamil Nadu, Telangana, Uttar Pradesh | analysis of IFRs, fatality and testing data   | Through 8 Apr 2020                   | none   | N/A                                                                                | N/A                                    | <i>Adjusting for death undercounting</i><br>India:<br>Andhra Pradesh:<br>Delhi: 0.396%<br>Gujarat: 0.437%<br>Haryana: 0.394%<br>Jammu & Kashmir: 0.358%<br>Karnataka: 0.440%<br>Kerala: 0.579%<br>Madhya Pradesh: 0.364%<br>Maharashtra: 0.435%<br>Rajasthan: 0.358%<br>Tamil Nadu: 0.524%<br>Telangana: 0.432%<br>Uttar Pradesh: 0.335% | N/A                                                                                                                                                                                                                            | Goli, 2020 [33] |
| IND–Puducherry                                                                                                                                                                   | serial three-phase cross-sectional serosurvey | 11–16 Aug, 10–16 Sep, 12–16 Oct 2020 | age≥18 | N=2667 (869 in Phase 1, 898 in Phase 2, 900 in Phase 3)<br>non-response rate: 2.2% | mean age: N/A (median age in mid-40's) | <i>Phase 1   Phase 2   Phase 3</i><br>73.4 deaths per 100,000 infected persons   75.8 deaths per 100,000 infected persons   106.1 deaths per 100,000 infected persons                                                                                                                                                                    | <i>Phase 1   Phase 2   Phase 3</i><br>Overall: 4.9 (3.5–6.4)   20.7 (18.0–23.3)   34.5 (31.5–37.7)<br>Female: 6.3 (4.0–8.6)   20.0 (16.3–23.6)   37.2 (33.1–41.6)<br>Male: 3.6 (1.9–5.4)   21.4 (17.6–25.2)   31.0 (26.7–35.6) | Kar, 2021 [34]  |

|                |                        |                    |        |                                           |                                                 |                                                                                                                                                                                                                                                                                                                              |                                                                                                                                                                                                                                                                                                                                                                                                                                    |                   |
|----------------|------------------------|--------------------|--------|-------------------------------------------|-------------------------------------------------|------------------------------------------------------------------------------------------------------------------------------------------------------------------------------------------------------------------------------------------------------------------------------------------------------------------------------|------------------------------------------------------------------------------------------------------------------------------------------------------------------------------------------------------------------------------------------------------------------------------------------------------------------------------------------------------------------------------------------------------------------------------------|-------------------|
|                |                        |                    |        |                                           |                                                 |                                                                                                                                                                                                                                                                                                                              | Age 18–29: 4.7 (1.5–7.8)<br>  20.0 (13.9–26.1)   32.2<br>(25.8–39.3)<br>Age 30–44: 4.4 (2.1–6.7)<br>  20.9 (16.2–25.7)   36.5<br>(30.8–42.6)<br>Age 45–59: 5.4 (2.5–8.2)<br>  23.6 (18.5–28.7)   39.0<br>(33.2–45.0)<br>Age ≥60: 5.6 (2.0–9.1)  <br>16.7 (11.4–22.1)   28.7<br>(23.0–35.1)<br>Rural: 3.1 (1.0–5.2)  <br>20.8 (16.0–25.7)   31.6<br>(26.3–37.4)<br>Urban: 5.7 (3.9–7.5)  <br>20.7 (17.5–23.8)   35.8<br>(32.1–39.7) |                   |
| IND–Tamil Nadu | cross-sectional survey | 19 Oct–30 Nov 2020 | age≥18 | N=26,135<br>non-response rate: <i>N/A</i> | 61% female and 39% male<br>mean age: <i>N/A</i> | Female age 18–29: 0.002%<br>Female age 30–39: 0.006%<br>Female age 40–49: 0.019%<br>Female age 50–59: 0.060%<br>Female age 60–69: 0.143%<br>Female age ≥70: 0.266%<br>Male age 18–29: 0.003%<br>Male age 30–39: 0.015%<br>Male age 40–49: 0.045%<br>Male age 50–59: 0.164%<br>Male age 60–69: 0.380%<br>Male age ≥70: 0.923% | Overall: 31.6 (30.4–32.8)<br>Female: 32.1 (31.1–33.0)<br>Male: 30.4 (29.6–31.2)<br>Age 18–29: 31.1 (30.3–31.8)<br>Age 30–39: 32.0 (31.2–32.7)<br>Age 40–49: 33.3 (32.5–34.0)<br>Age 50–59: 33.2 (32.4–33.9)<br>Age 60–69: 28.4 (27.7–29.1)<br>Age ≥70: 25.2 (24.5–25.8)                                                                                                                                                            | Malani, 2021 [35] |



|                                                              |                                               |                                          |       |                                                                                                      |                                                                         |                                                                           |                                                                                                                                                                                                                                 |                  |
|--------------------------------------------------------------|-----------------------------------------------|------------------------------------------|-------|------------------------------------------------------------------------------------------------------|-------------------------------------------------------------------------|---------------------------------------------------------------------------|---------------------------------------------------------------------------------------------------------------------------------------------------------------------------------------------------------------------------------|------------------|
|                                                              |                                               |                                          |       |                                                                                                      |                                                                         |                                                                           | Rural: 25.1 (24.2–26.1)<br>Urban: 36.7 (35.7–37.7)                                                                                                                                                                              |                  |
| IND–Ujjain, Madhya Pradesh                                   | cross-sectional survey                        | 24 Aug–5 Sep 2020                        | age≥1 | N=4883<br>non-response rate: <i>N/A</i>                                                              | 56.3% female and 43.7% male<br>mean age: <i>N/A</i>                     | <i>N/A</i>                                                                | Overall: 13.9 (10.4–18.0)<br>Female: 11.7<br>Male: 16.5<br>Age <15: 9.5<br>Age 15–30: 12.2<br>Age 30–45: 17.1<br>Age 45–60: 16.7<br>Age >60: 10.8                                                                               | Joshi, 2021 [36] |
| PAK–District East and District Malir in Karachi <sup>3</sup> | serial three-round cross-sectional serosurvey | 15–25 Apr, 25 Jun–11 Jul, 17–22 Aug 2020 | none  | N=3005<br>non-response rate: <i>N/A</i><br>(refusal rates 68%, 43%, 61% for DE; 44%, 42%, 8% for DM) | mean age: 25.9–27.1 for District East and 24.32–28.5 for District Malir | <i>Phase 1</i>   <i>Phase 2</i>   <i>Phase 3</i><br>1.66%   0.37%   0.26% | <i>Phase 1</i>   <i>Phase 2</i>   <i>Phase 3</i><br><br><i>District East</i><br>Overall: 0.4 (0.0–1.3)   15.1 (9.4–21.7)   21.5 (15.6–28)<br><i>District Malir</i><br>Overall: 0.2 (0.0–0.7)   8.7 (5.1–13.1)   12.8 (8.3–17.7) | Nisar, 2021 [37] |
| PAK–Khyber Pakhtunkhwa Sindh, Punjab <sup>3</sup>            | cross-sectional serosurvey                    | 15–31 Jul 2020                           | none  | N=15,390<br>non-response rate: <i>N/A</i>                                                            | 20.2% female and 79.8% male<br>mean age: 35.2 (± 13.2) years            | <i>N/A</i>                                                                | <i>Across provinces</i><br>Overall: 42.4 (41.5–43.14)<br>Female: 40.5 (38.7–42.2)<br>Male: 42.8 (41.9–43.7)<br>Age ≤20: 36.7 (34.2–39.1)<br>Age 21–40: 42.3 (41.3–43.3)<br>Age 41–60: 44.3 (42.7–45.9)                          | Haq, 2021 [38]   |

Age >60: 44.6 (40.7–48.5)  
*Khyber Pakhtunkhwa*  
 Overall: 42.2 (41.2–44.0)  
*Sindh*  
 Overall: 31.8 (29.6–34.1)  
  
*Punjab*  
 Overall: 44.5 (43.5–45.6)

*Note:* Entries are in alphabetical order by location of study and in descending order by study start date. N/A = Not Available. Studies highlighted in grey have been included in the quantitative analysis.

<sup>1</sup> No reported death or case counts are available for the city or slum from *covid19india.org*, at the time of this review.

<sup>2</sup> No 95% confidence intervals (CI) or 95% credible intervals were provided in the underlying study for either IFR or seroprevalence estimate.

<sup>3</sup> Location of the study is outside of India and the meta-analysis focuses on India.

<sup>a</sup> The 95% confidence intervals (CI) or 95% credible intervals presented in this table are directly reported from each underlying study, if provided.

<sup>b</sup> Data from media reports. (Hindustan Times 2021: Available at: <https://www.hindustantimes.com/cities/delhi-news/a-look-at-serological-surveys-conducted-in-delhi101612270983224.html>)

<sup>c</sup> Data from media reports. (The Hindu. Published online July 22, 2020. Available at: <https://www.thehindu.com/news/cities/Delhi/percentage-of-people-with-antibodies-high/article32156162.ece>)

<sup>d</sup> Data collected from technical report. (Available at: [https://www.tifr.res.in/TSN/article/Mumbai-Serosurvey%20Technical%20report-NITI\\_BMC-Round-2%20for%20TIFR%20website.pdf](https://www.tifr.res.in/TSN/article/Mumbai-Serosurvey%20Technical%20report-NITI_BMC-Round-2%20for%20TIFR%20website.pdf))

<sup>e</sup> Data from media reports. (The Hindu. Published on April 25, 2021. Available at: <https://www.thehindu.com/news/cities/mumbai/third-sero-survey-antibodies-in-3630-samples-in-mumbai/article34404107.ece>)

<sup>f</sup> Data from media reports. (Press Information Bureau, National Media Center. Briefing on COVID-19. Published on July 20, 2021)

## Appendix D. List of excluded articles

**Table 1. List of excluded articles from qualitative review and reason for exclusion.**

| First Author, Ref  | Location (Country–Location)    | Reason for Exclusion                       |
|--------------------|--------------------------------|--------------------------------------------|
| Ahamad, [39]       | Bangladesh                     | Provides no relevant seroprevalence or IFR |
| Ahamad, [40]       | Bangladesh                     | Provides no relevant seroprevalence or IFR |
| Al-Bari, [41]      | Bangladesh                     | Provides no relevant seroprevalence or IFR |
| Barnwal, [42]      | Bangladesh                     | Provides no relevant seroprevalence or IFR |
| Dey, [43]          | Bangladesh                     | Provides no relevant seroprevalence or IFR |
| Hasan, [44]        | Bangladesh                     | Active recruitment of participants         |
| Islam, [45]        | Bangladesh                     | Provides no relevant seroprevalence or IFR |
| Islam, [46]        | Bangladesh                     | Provides no relevant seroprevalence or IFR |
| Khan, [47]         | Bangladesh                     | Provides no relevant seroprevalence or IFR |
| Mukaddes, [48]     | Bangladesh                     | Provides no relevant seroprevalence or IFR |
| Rahman, [49]       | Bangladesh                     | Provides no relevant seroprevalence or IFR |
| Siam, [50]         | Bangladesh                     | Provides no relevant seroprevalence or IFR |
| Russell, [51]      | Bangladesh and others          | Provides forecasted estimates              |
| Rana, [52]         | Bangladesh–Southern Bangladesh | Focuses on asymptomatic individuals        |
| Adapa, [53]        | India                          | Provides no relevant seroprevalence or IFR |
| Adapa, [54]        | India                          | Provides no relevant seroprevalence or IFR |
| Al Arydah, [55]    | India                          | Provides no relevant seroprevalence or IFR |
| Asirvatham, [56]   | India                          | Provides no relevant seroprevalence or IFR |
| Cai, [57]          | India                          | Previous version                           |
| Chatterjee, [58]   | India                          | Provides no relevant seroprevalence or IFR |
| Chatterjee, [59]   | India                          | Provides forecasted estimates              |
| Frost, [60]        | India                          | Provides forecasted estimates              |
| Gonzalez, [61]     | India                          | Provides no relevant seroprevalence or IFR |
| Gupta, [62]        | India                          | Focuses on tested individuals              |
| Gupta, [63]        | India                          | Provides no relevant seroprevalence or IFR |
| Jahan, [64]        | India                          | Provides no relevant seroprevalence or IFR |
| Kumar, [65]        | India                          | Provides no relevant seroprevalence or IFR |
| Kumar, [66]        | India                          | Provides no relevant seroprevalence or IFR |
| Menon, [67]        | India                          | Provides no relevant seroprevalence or IFR |
| Mohanty, [68]      | India                          | Provides no relevant seroprevalence or IFR |
| Mukhopadhyay, [69] | India                          | Provides no relevant seroprevalence or IFR |
| Naushin, [70]      | India                          | Focuses on laboratory workers              |
| Neve, [71]         | India                          | Provides forecasted estimates              |
| Parai, [72]        | India                          | Focuses on healthcare workers              |
| Radha, [73]        | India                          | Provides no relevant seroprevalence or IFR |
| Ranjan, [74]       | India                          | Provides no relevant seroprevalence or IFR |

|                      |                                               |                                               |
|----------------------|-----------------------------------------------|-----------------------------------------------|
| Jayesh, [75]         | India                                         | Provides no relevant seroprevalence or IFR    |
| Singh, [76]          | India                                         | Focuses on high contact workers               |
| Srivastav, [77]      | India                                         | Provides no relevant seroprevalence or IFR    |
| Tamrakar, [78]       | India                                         | Provides no relevant seroprevalence or IFR    |
| Unnikrishnan, [79]   | India                                         | Provides no relevant seroprevalence or IFR    |
| Venkatesan, [80]     | India                                         | Conducted at a hospital/healthcare clinic/ICU |
| Wang, [81]           | India                                         | Provides forecasted estimates                 |
| Yadav, [82]          | India                                         | Focuses on patient cohort                     |
| Ansari, [83]         | India                                         | Provides no relevant seroprevalence or IFR    |
| Abraham, [84]        | India                                         | Provides no relevant seroprevalence or IFR    |
| Giri, [85]           | India and hotspot regions                     | Provides no relevant seroprevalence or IFR    |
| Shah, [86]           | India and others                              | Provides no relevant seroprevalence or IFR    |
| Wong, [87]           | India and others                              | Examines pediatric participants               |
| Zaveri, [88]         | India and others                              | Provides no relevant seroprevalence or IFR    |
| Bhattacharyya, [89]  | India and states                              | Previous version                              |
| Chauhan, [90]        | India and states                              | Provides no relevant seroprevalence or IFR    |
| Meghana, [91]        | India and states                              | Provides forecasted estimates                 |
| Mukherjee, [92]      | India and states                              | Previous version                              |
| Purkayastha, [93]    | India and states                              | Previous version                              |
| Patel, [94]          | India, Bangladesh, and Pakistan               | Provides no relevant seroprevalence or IFR    |
| Velumani, [95]       | India—12 cities across India                  | Focuses on tested individuals                 |
| Gupta, [96]          | India—52 districts and 20 states across India | Focuses on SARI patient cohort                |
| Prakash, [97]        | India—Ahmedabad, Gujarat                      | Focuses on healthcare workers                 |
| Mahto, [98]          | India—Bihar                                   | Focuses on healthcare workers                 |
| Malani, [99]         | India—Bihar                                   | Focuses on working individuals                |
| Madhusudan, [100]    | India—Chennai, Tamil Nadu                     | Focuses on healthcare workers                 |
| Pons Salort, [101]   | India—Delhi                                   | Provides forecasted estimates                 |
| Siddiqui, [102]      | India—Delhi                                   | Conducted at a hospital/healthcare clinic/ICU |
| Thiruvengadam, [103] | India—Delhi                                   | Focuses on patient cohort                     |
| Kaushal, [104]       | India—Dharavi Slum in Mumbai, Maharashtra     | Provides no relevant seroprevalence or IFR    |
| Mishra, [105]        | India—Eastern India                           | Focuses on healthcare workers                 |
| Kataria, [106]       | India—Gurugram, Haryana                       | Focuses on healthcare workers                 |
| Ranjan, [107]        | India—Karnataka                               | Provides no relevant seroprevalence or IFR    |
| Khan, [108]          | India—Kashmir                                 | Focuses on healthcare workers                 |
| Kumar, [109]         | India—Kerala                                  | Focuses on healthcare workers                 |
| Kaur, [110]          | India—Majha, Punjab                           | Focuses on patient cohort                     |
| Goenka, [111]        | India—metropolitan city                       | Focuses on healthcare workers                 |
| Kumar, [112]         | India—Mumbai, Maharashtra                     | Focuses on healthcare workers                 |

|                     |                                          |                                                                  |
|---------------------|------------------------------------------|------------------------------------------------------------------|
| Mahajan, [113]      | India–Mumbai, Maharashtra                | Focuses on healthcare workers                                    |
| Mahajan, [114]      | India–Mumbai, Maharashtra                | Focuses on healthcare workers                                    |
| Singhal, [115]      | India–Mumbai, Maharashtra                | Focuses on healthcare workers                                    |
| Tanna, [116]        | India–Nagpur, Maharashtra                | Focuses on patient cohort                                        |
| Sharma, [117]       | India–New Delhi                          | Focuses on healthcare workers                                    |
| Gupta, [118]        | India–Northern India                     | Focuses on healthcare workers                                    |
| Khan, [119, p. 2]   | India–District Srinagar                  | Focuses on patient cohort                                        |
| Satpati, [120]      | India–Paschim Medinipur, West Bengal     | Focuses on asymptomatic individuals                              |
| Mahto, [121]        | India–Patna, Bihar                       | Focuses on healthcare workers                                    |
| Bogam, [122]        | India–Pune, Maharashtra                  | Provides no relevant seroprevalence or IFR                       |
| Ghose, [123]        | India–Pune, Maharashtra                  | Focuses on asymptomatic individuals and high incidence sub-wards |
| Monteiro, [124]     | India–Pune, Maharashtra                  | Provides no relevant seroprevalence or IFR                       |
| Sharma, [125]       | India–Punjab                             | Provides no relevant seroprevalence or IFR                       |
| Vignesh, [126]      | India–Tamil Nadu                         | Provides no relevant seroprevalence or IFR                       |
| Laxminarayan, [127] | India–Tamil Nadu and Andhra Pradesh      | Provides no relevant seroprevalence or IFR                       |
| Panchamia, [128]    | India–three states in Western India      | Focuses on elderly homes                                         |
| Suresh, [129]       | India–Uttar Pradesh                      | Conducted at a hospital/healthcare clinic/ICU                    |
| Banerjee, [130]     | India–West Bengal                        | Conducted at a hospital/healthcare clinic/ICU                    |
| Basnet, [131]       | Nepal                                    | Provides no relevant seroprevalence or IFR                       |
| Dhimal, [132]       | Nepal                                    | Provides no relevant seroprevalence or IFR                       |
| Pathak, [133]       | Nepal                                    | Provides no relevant seroprevalence or IFR                       |
| Sharma, [134]       | Nepal                                    | Conducted at a hospital/healthcare clinic/ICU                    |
| Abbas, [135]        | Pakistan                                 | Focuses on healthcare workers                                    |
| Chaudhry, [136]     | Pakistan                                 | Provides no relevant seroprevalence or IFR                       |
| Din, [137, p. 19]   | Pakistan                                 | Provides no relevant seroprevalence or IFR                       |
| Peter, [138]        | Pakistan                                 | Provides forecasted estimates                                    |
| Waqar, [139]        | Pakistan                                 | Focuses on symptomatic individuals                               |
| Zaidi, [140]        | Pakistan                                 | Focuses on working individuals                                   |
| Naiyar, [141]       | Pakistan–Gujrat, Punjab                  | Conducted at a hospital/healthcare clinic/ICU                    |
| Younas, [142]       | Pakistan–Karachi, Sindh                  | Conducted among blood donors                                     |
| Ali, [143]          | Pakistan–Khyber Pakhtunkhwa              | Focuses on patient cohort                                        |
| Haq, [144]          | Pakistan–Khyber Pakhtunkhwa              | Focuses on healthcare workers                                    |
| Javed, [145]        | Pakistan–multiple cities across Pakistan | Focuses on working individuals                                   |
| Nisar, [146, p. 2]  | Pakistan–Peshawar                        | Conducted among blood donors                                     |
| Jeewandara, [147]   | Sri Lanka–Colombo, Western Province      | Focuses on asymptomatic individuals                              |

## Appendix E. Summary of excluded articles

**Table 1. Summary of excluded articles by country, type of study, and reason**

| Exclusion Reason <sup>a</sup>              | Type of Study | Number of Excluded Studies |            |          |           |           |
|--------------------------------------------|---------------|----------------------------|------------|----------|-----------|-----------|
|                                            |               | India                      | Bangladesh | Nepal    | Pakistan  | Sri Lanka |
| Hospital, urgent or tertiary care          | Serosurvey    | 6                          | --         | --       | 2         | --        |
|                                            | Other         | 6                          | --         | 1        | --        | --        |
| Healthcare workers                         | Serosurvey    | 16                         | --         | --       | 2         | --        |
|                                            | Other         | --                         | --         | --       | --        | --        |
| Workers <sup>b</sup>                       | Serosurvey    | 1                          | --         | --       | 2         | --        |
|                                            | Other         | 1                          | --         | --       | --        | --        |
| Asymptomatic or Symptomatic                | Serosurvey    | 2                          | 1          | --       | 1         | 1         |
|                                            | Other         | --                         | --         | --       | --        | --        |
| Blood donors                               | Serosurvey    | --                         | --         | --       | 2         | --        |
|                                            | Other         | --                         | --         | --       | --        | --        |
| Testing center                             | Serosurvey    | 1                          | --         | --       | --        | --        |
|                                            | Other         | 1                          | --         | --       | --        | --        |
| Active recruitment                         | Serosurvey    | --                         | --         | --       | --        | --        |
|                                            | Other         | --                         | 1          | --       | --        | --        |
| Elderly care persons                       | Serosurvey    | --                         | --         | --       | --        | --        |
|                                            | Other         | 1                          | --         | --       | --        | --        |
| No relevant measures                       | Serosurvey    | --                         | --         | --       | --        | --        |
|                                            | Other         | 43                         | 13         | 3        | 4         | --        |
| <b>Total Excluded Studies<sup>c</sup>:</b> |               | <b>78</b>                  | <b>15</b>  | <b>4</b> | <b>13</b> | <b>1</b>  |

(a) Studies excluded in the full-text screening are included in this table.

(b) Study population is limited to one or more working occupations (e.g., industrial workers, street vendors, industrial workers and street vendors, etc.).

(c) The summation of *Total Excluded Studies* across countries does not equal 109 studies because there are studies that examine multiple of the focus countries (e.g., India and Bangladesh, etc.). Phrased otherwise, the column counts in this table are not mutually exclusive.

## Appendix F. Meta-analysis methodology

The aims of the meta-analysis are two-fold (1) estimate a nationwide IFR<sub>1</sub> and IFR<sub>2</sub> with lower and upper bounds based on nationwide excess deaths, and (2) estimate regional IFR<sub>1</sub> and IFR<sub>2</sub> with lower and upper bounds based on state/city/district-specific excess deaths.

### Data collection and preparation

A description of the data collection and preparation of the datafile for the meta-analysis is provided in the **Methods** section. Here we elaborate on aspects that require further explanation and clarification.

For included studies with a pre-calculated infection fatality rate, the IFR<sub>1</sub> and/or IFR<sub>2</sub>, along with the 95% confidence interval, are directly extracted from the included study. For studies that provide a pre-calculated IFR<sub>1</sub> but no IFR<sub>2</sub> (i.e., do not further account for death underreporting), we compute the IFR<sub>2</sub> through multiplying the numerator of the pre-calculated IFR<sub>1</sub> by the appropriate range of excess deaths estimates. For studies that report a pre-calculated IFR<sub>2</sub> but no IFR<sub>1</sub> (i.e., do not provide preliminary infection fatality estimate without accounting for death reporting), we compute the IFR<sub>1</sub>, using the seroprevalence estimate quoted within the included study and following the same steps described below to compute IFR<sub>1</sub>.

For studies without a pre-calculated IFR<sub>1</sub> and/or IFR<sub>2</sub>, IFR<sub>1</sub> and/or IFR<sub>2</sub> is computed, as given in the below formulas

$$IFR_1 = \frac{\text{Reported Cumulative Deaths}}{\text{Estimated Total Cumulative Infections}} \quad (a)$$

$$IFR_2 = \frac{\text{Estimated Total Cumulative Deaths}}{\text{Estimated Total Cumulative Infections}} \quad (b)$$

where

**Estimated Total Cumulative Infections** = Seroprevalence \* Age Adjusted Population

and

**Estimated Total Cumulative Deaths** = Reported Cumulative Deaths \* Death Underreporting Factor.

For the denominator in formulas (a) and (b), the seroprevalence estimate corresponding to the general study population, as well as the 95% confidence interval, are directly extracted from the included study. We retrieved seroprevalence estimates that were adjusted (within the serosurvey design) for the test performance and weighted to be representative of the study's general population (typically, for the demographics age and sex, among others, such as rural versus urban), if available. For studies that did not both weight and account for test

performance, we extracted the solely weighted or solely test performance adjusted seroprevalence estimate, as provided. For studies that did not report either a weighted or a test performance adjusted seroprevalence estimate, we retrieved the provided crude seroprevalence estimates. The age-adjusted population estimate is calculated as the 2019 projected population estimate on the 2011 census website multiplied by the proportion of the population above the age-cutoff of the included study (e.g., proportion of the population of Karnataka aged  $\geq 18$  years), as obtained from the age composition for the study area from the 2011 census. As noted in the **Results** section, for select cities and districts, no 2019 projected population estimate was available and as such we use the 2011 census population estimates for the following cities and districts: Ahmedabad, Chennai, Bangalore Rural District, Indore, Ujjain. We note that this may lead to an overestimation of  $IFR_1$  nor  $IFR_2$  from these studies, and in turn slightly inflated pooled estimates for the regions containing these study locations.

For the numerator in formulas (a) and (b), COVID-19 reported cumulative deaths are sourced from [covid19india.org](https://covid19india.org) and collected 14 days after the study end date to account for delay in death from SARS-CoV-2 symptom onset. In practice, reported (i.e., observed) deaths for the target population are obtained some specified number of days after the end date of the serological study that varies between studies (e.g., from 2 days [35] to 21 days [14] [18], among others). Levin et al., 2021 [148] perform a simulation-based sensitivity analysis to derive an appropriate fatality delay, and propose and adopt in their systematic review of age-specific infection fatality rates a fatality delay of 4 weeks after the midpoint of the serosurvey. As previously discussed, reported deaths were not available for select cities or districts in [covid19india.org](https://covid19india.org) and so we were not able to compute  $IFR_1$  nor  $IFR_2$  for the cities or districts-level studies Berhampur, Bhubaneswar, Pimpri-Chinchwad, Rourkela and Devarajeevana Halli slum in Bengaluru, and thereby were not able to include these studies in the quantitative meta-analysis (as listed in **Appendix G**).

For the numerator in formula (b), the death under reporting factor is either directly extracted from media reports and excess deaths studies available at the time of this report (as are listed in the **Methods** section) or calculated using excess cumulative deaths estimates provided within these sources. For the latter, URF (D) is computed as the provided excess deaths estimate divided by the COVID-19 reported deaths 14 days after the end date of the study end date, as previously reasoned. As previously noted, excess deaths were not available for the following states at the time of this study and so we were unable to compute  $IFR_2$ , as well as include in the regional analysis, the following states and corresponding studies: Jammu and Kashmir (ref) and Puducherry (ref).

Being that the infection fatality rate (IFR) measure is understood to be a rate and that upon inspection its distribution was heavily right skewed, a log transformation is applied to the sampling data to approximate a normal distribution.



For the 95% confidence interval for  $IFR_1$ , first we obtain the standard error for seroprevalence from the directly provided 95% confidence interval from each included study as

$$se_{sero} = \frac{Upper-Lower}{1.96*2} = \frac{Upper-Lower}{3.92} \quad (c)$$

Now that we have the standard error for seroprevalence, the standard error for the log of  $IFR_1$  can be obtained as  $IFR_1$  relies on *Seroprevalence* as detailed in formula (a) above. First, notice that

$$\log(IFR_1) = \log\left\{\frac{Reported\ Deaths}{Total\ Cumulative\ Infections}\right\}$$

By rules of logarithmic operations, it follows that

$$= \log(Reported\ Deaths) - \log(Total\ Cumulative\ Infections)$$

By the definition in formula (a) and assuming *Reported Deaths* do not contribute to variability and are thereby fixed, it follows that

$$= C - \log(n * \hat{p}_{sero})$$

where  $n$  is the study sample size and  $\hat{p}_{sero}$  is the seroprevalence estimate from the included study.

By rules of logarithmic operations, we have that

$$= C - \log(n) - \log(\hat{p}_{sero})$$

Assuming  $n$  does not contribute to variability and fixing at some constant

$$= C^* - \log(\hat{p}_{sero})$$

Therefore,  $\log(IFR_1) = C^* - \log(\hat{p}_{sero})$ . Let us consider the variance of  $\log(IFR_1)$ .

Substituting in for  $\log(IFR_1)$  from above, we have

$$Var(\log IFR_1) = Var(\log \hat{p}_{sero})$$

From the Taylor Series expansion, it follows that

$$Var(\log \hat{p}_{sero}) \approx \frac{1}{\hat{p}_{sero}^2} Var(\hat{p}_{sero})$$

Then, the standard error for the log of  $IFR_1$  is given by

$$se_{IFR_1} \approx \frac{1}{\hat{p}_{sero}} * se_{sero}$$

where  $se_{sero}$  is defined as in formula (c) above and  $\hat{p}_{sero}$  is the directly provided seroprevalence estimate.

Then, letting  $\hat{\theta}$  denote the estimate of  $\log IFR_1$ , the asymptotic approximate 95% confidence interval for  $\log IFR_1$  is as follows:

$$(\hat{\theta} - 1.96 * se_{IFR_1}, \hat{\theta} + 1.96 * se_{IFR_1})$$

The resulting confidence intervals are then exponentiated to back-transform from the logarithmic scale.

For the 95% confidence interval for  $IFR_2$ , as the upper and lower bounds of the 95% confidence interval for the associated  $URF$  ( $D$ ) are often not available (i.e., the range of uncertainty associated with excess deaths estimates is not consistently available), the asymptotic approximate 95% confidence interval for  $IFR_2$  is obtained by multiplying the 95% confidence interval for  $IFR_1$  by the associated  $URF$  ( $D$ ).

### **Meta-analysis framework**

A random effects model is used with the DerSimonian-Laird (DL) estimator for  $\tau^2$  (also denoted as  $\tau_{DL}^2$ ), the variance of the true effect sizes. The DL estimator,  $\widehat{\tau_{DL}^2}$ , is given by

$$\widehat{\tau_{DL}^2} = \max \left\{ 0, \frac{Q_w - (k - 1)}{\left[ \sum_i w_i - \left( \frac{\sum_i w_i^2}{\sum_i w_i} \right) \right]} \right\} \quad (e)$$

where  $Q_w$  denotes the appropriate test statistic with  $k-1$  denoting the degrees of freedom and  $w_i$  denotes the sampling weight for the  $i^{th}$  included study datapoint.

The inverse variance approach is then used to obtain the pooled estimates (nationwide, regional, and state-specific within India). This means that the weighting in the random effects model is the inverse of the sampling variance, as follows

$$w_i^{\{DL\}} = \frac{1}{se_i^2 + \widehat{\tau_{DL}^2}} \quad (f)$$

where  $i$  denotes the  $i^{th}$  included study datapoint,  $se_i^2$  is the standard error from the  $i^{th}$  included study estimate, and  $\widehat{\tau_{DL}^2}$  is the DL estimated random effects variance component, as defined in (e) above.

Using a random effects model with inverse variance method and DL estimator, the estimate for the pooled effect size is then given as follows:

$$\hat{\theta} = \frac{\sum_i \hat{\theta}_i w_i^{\{DL\}}}{\sum_i w_i^{\{DL\}}} \quad (e)$$

As previously mentioned, a log transformation is applied to the sampling data to approximate a normal distribution. In other words, we log transform both  $IFR_1$  and  $IFR_2$  in the meta-analysis and appropriately back-transform the resulting point estimates and standard errors by exponentiating the log-transformed values. Hence,  $\hat{\theta}$  in (e) above in this context is  $\hat{\theta}'_{IFR_1} = \log(\hat{\theta}_{IFR_1})$  and, similarly,  $\hat{\theta}'_{IFR_2} = \log(\hat{\theta}_{IFR_2})$ .

Then, to estimate the nationwide pooled infection fatality rates ( $IFR_1$  and  $IFR_2$ ) for India, countrywide IFR estimates (pre-calculated or computed) among included studies (as verified through August 15, 2021) are pooled, as provided in (e) above using the random effects framework detailed. The nationwide pooled infection fatality estimate includes the computed IFRs from each of the four nationwide seroprevalence surveys conducted consecutively for India, as stratifying by time periods (i.e., the nationwide first and second waves of SARS-CoV-2 in India) is of particular interest.

To estimate the regional pooled infection fatality rates ( $IFR_1$  and  $IFR_2$ ) in India, IFR estimates (pre-calculated or computed) from included studies within a state are pooled, as provided in (e) above with the same random effects approach outlined. Then, the regional IFR is estimated as the pooled IFR across pooled state level IFRs, as provided in (e) except where  $i$  now denotes the  $i^{th}$  state. Since the regional analysis does not involve stratifying by waves (and thereby time points), for serial (or repeated) serosurveys for which multiple seroprevalence estimates are provided for a given study location at various time points, the most recent estimate is considered and included in the regional analysis.

Using the *meta* package in R, pooled effect sizes are estimated, as well as 95% confidence intervals, following the methodological framework above.

## Appendix G. Summary of excluded articles from quantitative summary

**Table 1. Summary of excluded articles from quantitative summary and reason for exclusion.**

| Reference                   | Location (Country–Location)                                                                                                                                                 | Reason for Exclusion                         |
|-----------------------------|-----------------------------------------------------------------------------------------------------------------------------------------------------------------------------|----------------------------------------------|
| Kshatri, 2021a<br>[4]       | India–Bhubaneswar                                                                                                                                                           | No fatality data available                   |
| Kshatri, 2021b<br>[5]       | India–Bhubaneswar, Berhampur, Rourkela cities of Odisha                                                                                                                     | No fatality data available                   |
| Banaji, 2021<br>[7]         | India–Chennai, Tamil Nadu                                                                                                                                                   | Provides no 95% confidence intervals         |
| Bhattacharyya, 2021<br>[11] | India–Delhi                                                                                                                                                                 | Provides no 95% confidence intervals         |
| <i>Other</i><br>[8]         | India–Delhi                                                                                                                                                                 | Provides no 95% confidence intervals         |
| <i>Other</i><br>[10]        | India–Delhi                                                                                                                                                                 | Provides no 95% confidence intervals         |
| Hazra, 2021<br>[12]         | India–Delhi, Mumbai, Pune, Bengaluru, Chennai                                                                                                                               | Provides no 95% confidence intervals         |
| Misra, 2021<br>[13]         | India–Delhi urban, Delhi rural, Bhubaneswar rural, Agartala rural, and Gorakhpur rural                                                                                      | No fatality data available                   |
| George, 2021<br>[14]        | India–Devarajeevana Halli slum in Bengaluru, Karnataka                                                                                                                      | Provides seroprevalence in slum              |
| <i>Other</i><br>[19]        | India–Mumbai, Maharashtra                                                                                                                                                   | Provides no 95% confidence intervals         |
| <i>Other</i><br>[21]        | India–Mumbai, Maharashtra                                                                                                                                                   | Provides seroprevalence in slum and non-slum |
| Malani, 2020<br>[22]        | India–Mumbai, Maharashtra                                                                                                                                                   | Provides seroprevalence in slum and non-slum |
| Bommer, 2020<br>[27]        | India–nationwide                                                                                                                                                            | Provides no 95% confidence intervals         |
| Bhaduri, 2020<br>[31]       | India–nationwide, Delhi, Maharashtra                                                                                                                                        | Provides no 95% confidence intervals         |
| Banerjee, 2020<br>[32]      | India–Pimpri-Chinchwad, Maharashtra                                                                                                                                         | No fatality data available                   |
| Goli, 2020<br>[33]          | India–nationwide, Andhra Pradesh, Delhi, Gujarat, Haryana, Jammu & Kashmir, Karnataka, Kerala, Madhya Pradesh, Maharashtra, Rajasthan, Tamil Nadu, Telangana, Uttar Pradesh | Provides no 95% confidence intervals         |
| Nisar, 2021<br>[37]         | Pakistan–District East and District Malir in Karachi                                                                                                                        | Focuses on location outside of India         |
| Haq, 2021<br>[38]           | Pakistan–Khyber Pakhtunkhwa Sindh, Punjab                                                                                                                                   | Focuses on location outside of India         |

## Appendix H. Summary of seroprevalence estimates within India

Below is a forest plot with the seroprevalence estimates used to compute  $IFR_1$  and in turn  $IFR_2$  (except for studies for which  $IFR_2$  was pre-calculated) in the meta-analysis of nationwide and regional IFRs.

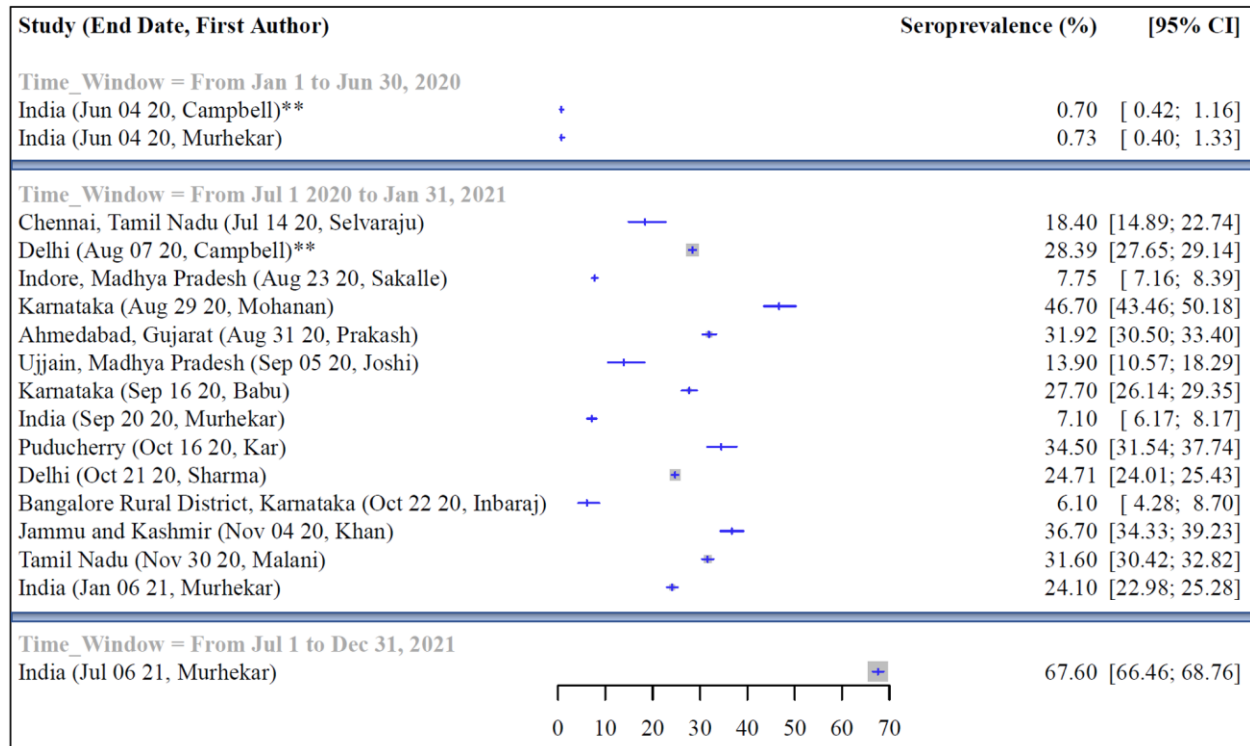

Figure 1. Forest plot of SARS-CoV-2 seroprevalence estimates for India utilized in meta-analysis of  $IFR_1$  and  $IFR_2$ .

## ***Appendix I. Risk of bias assessment across included articles***

See supplementary file *Supplementary\_RiskofBias.xlsx* for results from the risk of bias assessment among the included studies in the meta-analysis, using the Joanna Briggs Institute (JBI) tool. Responses to each question in the JBI approach, as well as the cumulative score and rank of risk of bias, are detailed for each of the 19 studies (i.e. 15 serosurvey studies and 4 other study designs).

## ***Appendix J. Assessment of publication bias***

To formally test for funnel plot asymmetry, the Egger's test (i.e., linear regression) is performed with a resulting p-value of 0.0501. Seeing as the significance level of the funnel plot intercept in the Egger's test nearly meets the benchmark of 0.05, we further conduct the Begg's test (i.e., rank correlation test) and with a p-value<0.0001, conclude that the funnel plot is asymmetric. As discussed within the **Results** section, despite the results of these diagnostic tests, we do not suspect that publication bias is the driving factor behind the observed asymmetry. Firstly, this is because the bulk of the included studies are seroprevalence studies, which are inherently large studies with rigorous study designs, thereby tending toward high precision (i.e., low standard errors). Secondly, there may be heterogeneity in the true effect size between the included studies for reasons such as geographic variation that may be attributing to the largely horizontal dispersion of the standard errors in **Figure 6** (the funnel plot) in the **Results** section, and funnel plots assume a single true effect size.

## Appendix K. SEIR-fansy model framework

(Note: Explanation below is unchanged from Supplementary Materials in previous submission<sup>1</sup>.)

### Introduction

Here we are using the SEIR-fansy model<sup>1,2</sup> and software package<sup>3</sup> which uses a compartmental model accounting for false negative rates and preferential diagnostic testing for SARS-CoV-2 infections. The SEIR-fansy model can be represented by the compartmental model in Figure S1.

<sup>1</sup>. Purkayastha S, Kundu R, Bhaduri R, Barker D, Kleinsasser M, Debashree R, Mukherjee B. Estimating the wave 1 and wave 2 infection fatality rates from SARS-CoV-2 in India. *BMC Res Notes*. **14**, 262 (2021). doi:10.1186/s13104-021-05652-2.

<sup>2</sup>. Bhaduri R, Kundu R, Purkayastha S, Kleinsasser M, Beesley LJ, Mukherjee B. *Extending the Susceptible-Exposed-Infected-Removed (SEIR) model to handle the high false negative rate and symptom-based administration of Covid-19 diagnostic tests: SEIR-fansy*. medRxiv [Preprint]. 2020 Sep 25:2020.09.24.20200238. doi: 10.1101/2020.09.24.20200238. PMID: 32995829; PMCID: PMC7523173.

<sup>3</sup>. Ritwik Bhaduri, Ritoban Kundu, Soumik Purkayastha, Lauren Beesley and Bhramar Mukherjee (2020). *SEIRfansy: Extended Susceptible-Exposed-Infected-Recovery Model*. R package version 1.1.0. <https://CRAN.R-project.org/package=SEIRfansy>

**Figure S1: Schematic diagram for the SEIR-fansy model with imperfect testing and misclassification.**

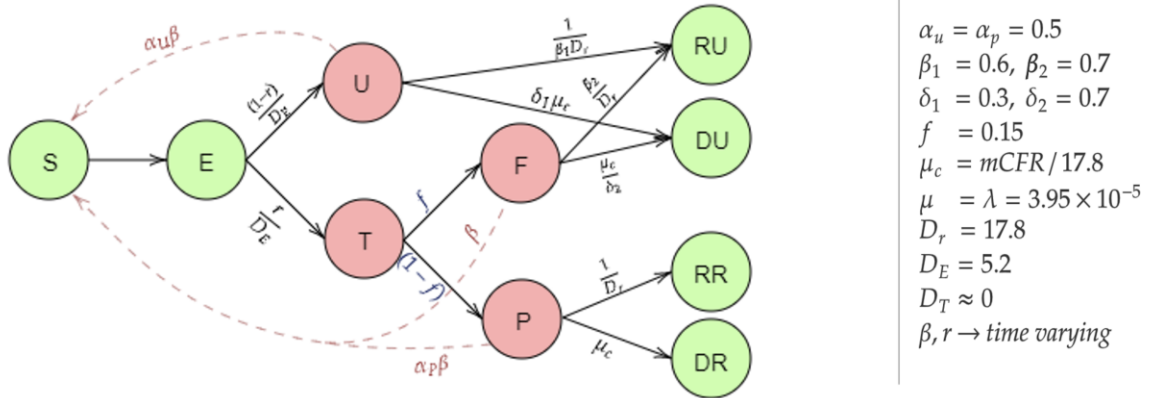

### Mathematical framework

The following differential equations summarize the transmission dynamics being modeled.

$$\frac{\partial S}{\partial t} = -\beta \frac{S(t)}{N} (\alpha_P P(t) + \alpha_U U(t) + F(t)) + \lambda N - \mu S(t)$$

$$\frac{\partial E}{\partial t} = \beta \frac{S(t)}{N} (\alpha_P P(t) + \alpha_U U(t) + F(t)) - \frac{E(t)}{D_e} - \mu E(t)$$

$$\frac{\partial U}{\partial t} = (1 - r) \frac{E(t)}{D_e} - \frac{U(t)}{\beta_1 D_r} - \delta_1 \mu_c U(t) - \mu U(t)$$

$$\frac{\partial P}{\partial t} = (1 - f) r \frac{E(t)}{D_e} - \frac{P(t)}{D_r} - \mu_c P(t) - \mu P(t)$$

$$\frac{\partial F}{\partial t} = f r \frac{E(t)}{D_e} - \frac{\beta_2 F(t)}{D_r} - \frac{\mu_c F(t)}{\delta_2} - \mu F(t)$$

$$\frac{\partial RU}{\partial t} = \frac{U(t)}{\beta_1 D_r} + \frac{\beta_2 F(t)}{D_r} - \mu RU(t)$$

$$\frac{\partial RR}{\partial t} = \frac{P(t)}{D_r} - \mu RR(t)$$

$$\frac{\partial DU}{\partial t} = \delta_1 \mu_c U(t) + \frac{\mu_c F(t)}{\delta_2},$$

$$\frac{\partial DR}{\partial t} = \mu_c P(t)$$

Using the Next Generation Matrix Method (28), we have calculated the basic reproduction number

$$R_0 = \frac{\beta S_0}{\mu D_e + 1} \left( \frac{\alpha_U (1 - r)}{\frac{1}{\beta_1 D_r} + \delta_1 \mu_c + \mu} + \frac{\alpha_P r (1 - f)}{\frac{1}{D_r} + \mu_c + \mu} + \frac{r f}{\frac{\beta_2}{D_r} + \frac{\mu_c}{\delta_2} + \mu} \right)$$

where  $S_0 = \lambda/\mu = 1$  since we have assumed that natural birth and death rates are equal within this short period of time. In this setting, both  $\beta$  and  $r$  are time-varying parameters which are estimated using the Metropolis-Hastings MCMC method. To estimate the parameters, we at first need to solve the differential equations, which is difficult to perform in this continuous-time setting. It is also worth noting that we do not require the values of the variables for each time point. Instead, we only need their values at discrete time steps, i.e., for each day. Thus, we approximate the above set of differential equations by a set of recurrence relations. For any compartment  $X$ , the instantaneous rate of change with respect to time  $t$  (given by  $\frac{\partial X}{\partial t}$ ) is approximated by the difference between the counts of that compartment on the  $(t + 1)^{th}$  day and the  $t^{th}$  day, that is  $X(t + 1) - X(t)$ . Starting with an initial value for each of the compartments on the Day 1 and using the discrete-time recurrence relations, we can then



obtain the solutions of interest. Some examples of these discrete-time recurrence relations are presented below.

$$\begin{aligned}
E(t+1) - E(t) &= \beta \frac{S(t)}{N} (\alpha_P P(t) + \alpha_U U(t) + F(t)) - \frac{E(t)}{D_e} - \mu E(t), \\
U(t+1) - U(t) &= \frac{(1-r)E(t)}{D_e} - \frac{U(t)}{\beta_1 D_r} - \delta_1 \mu_c U(t) - \mu U(t), \\
P(t+1) - P(t) &= \frac{r(1-f)E(t)}{D_e} - \frac{P(t)}{D_r} - \mu_c P(t) - \mu P(t), \\
F(t+1) - F(t) &= \frac{rfE(t)}{D_e} - \frac{\beta_2 F(t)}{D_r} - \frac{\mu_c F(t)}{\delta_2} - \mu F(t).
\end{aligned}$$

The rest of the differential equations can each be similarly approximated by a discrete-time recurrence relation.

### ***Likelihood assumptions and estimation***

We use Bayesian estimation techniques and Markov chain Monte Carlo (MCMC) methods (namely, Metropolis-Hastings method with Gaussian proposal distribution) for estimating the parameters. First, we approximated the above set of differential equations using a discrete time approximation using daily differences. So, after we started with an initial value for each of the compartments on the day 1, using the discrete time recurrence relations we can find the counts for each of the compartments on the next days. To proceed with the MCMC-based estimation, we specify the likelihood explicitly. We assume (conditional on the parameters) the number of new confirmed cases on day  $t$  depend only on the number of exposed individuals on the previous day. Specifically, we use multinomial modeling to incorporate the data on recovered and deceased cases as well. The joint conditional distribution is

$$\begin{aligned}
&P[P_{new}(t), R_{new}(t), D_{new}(t) | E(t-1), P(t-1)] \\
&= P[P_{new}(t) | E(t-1), P(t-1)] \cdot P[R_{new}(t), D_{new}(t) | E(t-1), P(t-1)] \\
&= P[P_{new}(t) | E(t-1)] \cdot P[R_{new}(t), D_{new}(t) | P(t-1)]
\end{aligned}$$

A multinomial distribution-like structure is then defined,

$$\begin{aligned}
P_{new}(t) | E(t-1) &\sim \text{Bin}\left(E(t-1), \frac{r(1-f)}{D_e}\right) \\
R_{new}(t), D_{new}(t) | P(t-1) &\sim \text{Mult}\left(P(t-1), \left(\frac{1}{D_r}, \mu_c, 1 - \frac{1}{D_r} - \mu_c\right)\right)
\end{aligned}$$

Note: the expected values of  $E(t-1)$  and  $P(t-1)$  are obtained by solving the discrete time differential equations as described earlier.

### **Prior assumptions and MCMC**

For the parameter  $r$ , we assume a  $U(0,1)$  prior, while for  $\beta$ , we assume an improper non-informative flat prior with the set of positive real numbers as support. After specifying the likelihood and the prior distributions of the parameters, we draw samples from the posterior distribution of the parameters using the Metropolis-Hastings algorithm with a Gaussian proposal distribution. We run the algorithm for 200,000 iterations with a burn-in period of 100,000. Finally, the mean of the parameters in each of the iterations are obtained as the final estimates of  $\beta$  and  $r$  for the different time periods. To obtain confidence intervals of various estimates we predict the number of individuals in each compartment given a set of parameters which are drawn using MCMC. This is done for 100,000 iterations. Using these values, we obtain the 95% Bayesian Credible Intervals of the estimates (such as infection fatality rates and underreporting factors)

### **Estimation of parameters of interest**

Our main parameters of interest here are Underreporting factors for cases and deaths and Infection Fatality rate. Underreporting factors (URF) for cases and deaths are defined as follows:

$$URF_{case} = \frac{\text{Estimated Total Cumulative Infections}}{\text{Observed Cumulative Cases}}$$
$$URF_{death} = \frac{\text{Estimated Total Cumulative Deaths}}{\text{Observed Cumulative Deaths}}$$

Here, total cumulative cases refers to all Cumulative cases including both reported and unreported cases. Similarly total cumulative deaths includes both reported and unreported deaths. Since we are unable to observe unreported cases or deaths we estimate total cumulative cases and deaths as follows:

1. Total Cumulative cases at time  $t = P(t)+U(t)+F(t)+RR(t)+RU(t)+DR(t)+DU(t)$
2. Total Cumulative deaths at time  $t = DR(t)+DU(t)$

To estimate the true fatality rate of COVID-19, we calculate 2 different infection fatality rates IFR1 and IFR2 as defined in formulas (a) and (b) respectively, in **Supplementary Appendix F**.

We also calculate the Case fatality rate as defined in the **Methods** section.

Now *Cumulative Deaths* follows a  $Bin(\text{Observed cumulative cases}, CFR_{true})$  distribution, with the estimate of  $CFR_{true}$  given by CFR, making CFR is a binomial proportion . Let  $\hat{p} = CFR$  and  $n = \text{Observed Cumulative Cases}$  . So the asymptotic approximate 95% confidence interval is given by

$$(\hat{p} - 1.96 \sqrt{\frac{\hat{p}(1-\hat{p})}{n}}, \hat{p} + 1.96 \sqrt{\frac{\hat{p}(1-\hat{p})}{n}}).$$

The estimates of infection fatality rates and underreporting factors are based on Bayesian credible intervals constructed from the exact posterior draws, as described before.

### ***Appendix L. Data source and model-based results***

The data has been sourced from [covid19india.org](https://covid19india.org). We used daily case-recovery-death count data from April 1, 2020 to January 31, 2021 for wave 1 and from February 1, 2021 – June 30, 2021 for wave 2. The predicted number of reported and total cases and deaths for January 31, 2021 (wave 1) and June 30 (for wave 2 and waves 1 and 2 combined) are shown in Tables S1, S2, and S3 respectively.

The mean estimates and the 95% CrI's of underreporting factors for cases and deaths on January 31, 2021 are shown in **Figure S2**. Relevant wave 2 values are presented in **Figure S3**.

**Table T1: Summary of the different metrics for the states and the nation for wave 1, on 31st  
January 2021**

| <b>Place</b>           | <b>Reported Cases<br/>(Observed)</b> | <b>Reported Cases<br/>(Predicted)</b> | <b>Total<br/>(reported +<br/>unreported)<br/>Cases<br/>(Predicted)</b> | <b>Reported Deaths<br/>(Observed)</b> | <b>Reported Deaths<br/>(Predicted)</b> | <b>Total<br/>(reported +<br/>unreported)<br/>Deaths<br/>(Predicted)</b> | <b>Cases per<br/>million</b> | <b>Deaths per<br/>million</b> |
|------------------------|--------------------------------------|---------------------------------------|------------------------------------------------------------------------|---------------------------------------|----------------------------------------|-------------------------------------------------------------------------|------------------------------|-------------------------------|
| Andaman and Nicobar    | 4990                                 | 4971                                  | 420209                                                                 | 62                                    | 62                                     | 1027                                                                    | 13111.53                     | 162.91                        |
| Andhra Pradesh         | 887836                               | 882030                                | 38244770                                                               | 7153                                  | 7125                                   | 64317                                                                   | 17908.19                     | 144.28                        |
| Arunachal Pradesh      | 16828                                | 16367                                 | 1177129                                                                | 56                                    | 54                                     | 773                                                                     | 12161.36                     | 40.47                         |
| Assam                  | 217039                               | 206824                                | 1576369                                                                | 1087                                  | 1050                                   | 2650                                                                    | 6955.14                      | 34.83                         |
| Bihar                  | 260719                               | 265325                                | 1752581                                                                | 1501                                  | 1515                                   | 3566                                                                    | 2504.52                      | 14.42                         |
| Chandigarh             | 20925                                | 21064                                 | 370319                                                                 | 334                                   | 330                                    | 1456                                                                    | 19825.67                     | 316.45                        |
| Chhattisgarh           | 305367                               | 306365                                | 3958345                                                                | 3701                                  | 3573                                   | 12372                                                                   | 11953.99                     | 144.88                        |
| Dadra and Nagar Haveli | 3377                                 | 3353                                  | 322500                                                                 | 2                                     | 2                                      | 38                                                                      | 5765.12                      | 3.41                          |
| Delhi                  | 635096                               | 634237                                | 17949712                                                               | 10853                                 | 10771                                  | 68212                                                                   | 37830.49                     | 646.48                        |
| Goa                    | 53409                                | 53536                                 | 1516370                                                                | 768                                   | 763                                    | 4854                                                                    | 36618                        | 526.55                        |
| Gujarat                | 261539                               | 239728                                | 1546257                                                                | 4386                                  | 3937                                   | 9160                                                                    | 4327.27                      | 72.57                         |
| Haryana                | 267897                               | 255093                                | 2212182                                                                | 3018                                  | 2849                                   | 7763                                                                    | 10567.32                     | 119.05                        |
| Jammu and Kashmir      | 124506                               | 120675                                | 11786372                                                               | 1936                                  | 1861                                   | 35906                                                                   | 10149.64                     | 157.82                        |
| Jharkhand              | 118667                               | 108448                                | 1142000                                                                | 1072                                  | 973                                    | 2982                                                                    | 3597.26                      | 32.5                          |
| Karnataka              | 939387                               | 931828                                | 7298441                                                                | 12224                                 | 12112                                  | 31189                                                                   | 15375.77                     | 200.08                        |
| Kerala                 | 929179                               | 973432                                | 6109388                                                                | 3744                                  | 3821                                   | 8781                                                                    | 27814.68                     | 112.08                        |
| Ladakh                 | 9720                                 | 9875                                  | 195168                                                                 | 130                                   | 131                                    | 627                                                                     | 35474.45                     | 474.45                        |
| Madhya Pradesh         | 255112                               | 246254                                | 2593075                                                                | 3811                                  | 3617                                   | 11092                                                                   | 3512.64                      | 52.47                         |
| Maharashtra            | 2026399                              | 1939901                               | 11106302                                                               | 51081                                 | 48974                                  | 107479                                                                  | 18032.58                     | 454.56                        |
| Manipur                | 29068                                | 28426                                 | 787087                                                                 | 371                                   | 359                                    | 2239                                                                    | 11308.79                     | 144.34                        |
| Meghalaya              | 13716                                | 12742                                 | 496017                                                                 | 146                                   | 135                                    | 1126                                                                    | 4623.02                      | 49.21                         |
| Mizoram                | 4372                                 | 4488                                  | 237273                                                                 | 9                                     | 9                                      | 98                                                                      | 3984.67                      | 8.2                           |
| Nagaland               | 12057                                | 11586                                 | 315789                                                                 | 82                                    | 83                                     | 506                                                                     | 6094                         | 41.45                         |
| Odisha                 | 335072                               | 322600                                | 1630327                                                                | 1959                                  | 1882                                   | 3873                                                                    | 7982.8                       | 46.67                         |
| Punjab                 | 173276                               | 176267                                | 1553488                                                                | 5615                                  | 5670                                   | 15692                                                                   | 6245.68                      | 202.39                        |
| Rajasthan              | 317491                               | 295702                                | 1696333                                                                | 2766                                  | 2552                                   | 5569                                                                    | 4631.63                      | 40.35                         |
| Sikkim                 | 6104                                 | 6136                                  | 177128                                                                 | 133                                   | 135                                    | 877                                                                     | 9997.1                       | 217.83                        |
| Tamil Nadu             | 838340                               | 842658                                | 5966633                                                                | 12356                                 | 12378                                  | 30119                                                                   | 11619.88                     | 171.26                        |
| Telangana              | 293959                               | 287679                                | 1625763                                                                | 1599                                  | 1560                                   | 3426                                                                    | 8397.95                      | 45.68                         |
| Tripura                | 33347                                | 32051                                 | 801142                                                                 | 388                                   | 374                                    | 2131                                                                    | 9076.69                      | 105.61                        |
| Uttar Pradesh          | 600299                               | 584173                                | 3838576                                                                | 8658                                  | 8418                                   | 19731                                                                   | 3004.31                      | 43.33                         |
| Uttarakhand            | 96129                                | 94366                                 | 2147503                                                                | 1644                                  | 1609                                   | 8655                                                                    | 9530.66                      | 162.99                        |
| West Bengal            | 569998                               | 548980                                | 3171287                                                                | 10173                                 | 9735                                   | 21392                                                                   | 6244.77                      | 111.45                        |
| India                  | 10758629                             | 10512888                              | 119510413                                                              | 154428                                | 149478                                 | 550380                                                                  | 8022.84                      | 115.16                        |

**Table T2: Summary of the different metrics for the states and the nation for wave 2, on 30th June  
2021**

| <b>Place</b>           | <b>Reported Cases<br/>(Observed)</b> | <b>Reported Cases<br/>(Predicted)</b> | <b>Total<br/>(reported +<br/>unreported)<br/>Cases<br/>(Predicted)</b> | <b>Reported Deaths<br/>(Observed)</b> | <b>Reported Deaths<br/>(Predicted)</b> | <b>Total<br/>(reported +<br/>unreported)<br/>Deaths<br/>(Predicted)</b> | <b>Cases per<br/>million</b> | <b>Deaths per<br/>million</b> |
|------------------------|--------------------------------------|---------------------------------------|------------------------------------------------------------------------|---------------------------------------|----------------------------------------|-------------------------------------------------------------------------|------------------------------|-------------------------------|
| Andaman and Nicobar    | 2475                                 | 2538                                  | 22006                                                                  | 66                                    | 63                                     | 178                                                                     | 6503.21                      | 173.42                        |
| Andhra Pradesh         | 1005454                              | 1052130                               | 24433883                                                               | 5590                                  | 5404                                   | 30424                                                                   | 20280.61                     | 112.75                        |
| Arunachal Pradesh      | 19341                                | 21105                                 | 168634                                                                 | 120                                   | 115                                    | 308                                                                     | 13977.47                     | 86.72                         |
| Assam                  | 293999                               | 320108                                | 10416260                                                               | 3494                                  | 3439                                   | 25964                                                                   | 9421.36                      | 111.97                        |
| Bihar                  | 461307                               | 459699                                | 9984295                                                                | 8089                                  | 7695                                   | 40041                                                                   | 4431.41                      | 77.7                          |
| Chandigarh             | 40730                                | 41573                                 | 581721                                                                 | 474                                   | 468                                    | 1746                                                                    | 38590.17                     | 449.1                         |
| Chhattisgarh           | 689201                               | 703661                                | 12440190                                                               | 9739                                  | 9717                                   | 42812                                                                   | 26979.67                     | 381.25                        |
| Dadra and Nagar Haveli | 7047                                 | 7415                                  | 132289                                                                 | 2                                     | 2                                      | 9                                                                       | 12030.44                     | 3.41                          |
| Delhi                  | 799064                               | 806934                                | 14348458                                                               | 14125                                 | 14016                                  | 62005                                                                   | 47597.5                      | 841.38                        |
| Goa                    | 113451                               | 116695                                | 1343287                                                                | 2292                                  | 2244                                   | 7401                                                                    | 77783.68                     | 1571.43                       |
| Gujarat                | 561769                               | 593952                                | 9133281                                                                | 5674                                  | 5834                                   | 23185                                                                   | 9294.7                       | 93.88                         |
| Haryana                | 500735                               | 522462                                | 10517838                                                               | 6424                                  | 6479                                   | 31671                                                                   | 19751.72                     | 253.4                         |
| Jammu and Kashmir      | 191410                               | 197500                                | 7943113                                                                | 2391                                  | 2315                                   | 20502                                                                   | 15603.61                     | 194.91                        |
| Jharkhand              | 226971                               | 236331                                | 4274772                                                                | 4040                                  | 4079                                   | 18394                                                                   | 6880.38                      | 122.47                        |
| Karnataka              | 1907238                              | 1962929                               | 37788085                                                               | 22914                                 | 22533                                  | 107790                                                                  | 31217.43                     | 375.05                        |
| Kerala                 | 2004396                              | 2083298                               | 23997385                                                               | 9599                                  | 9266                                   | 30606                                                                   | 60000.97                     | 287.34                        |
| Ladakh                 | 10366                                | 10916                                 | 117421                                                                 | 72                                    | 72                                     | 224                                                                     | 37832.12                     | 262.77                        |
| Madhya Pradesh         | 534581                               | 549186                                | 8512735                                                                | 5169                                  | 5160                                   | 20615                                                                   | 7360.66                      | 71.17                         |
| Maharashtra            | 4042252                              | 4073053                               | 59223522                                                               | 71088                                 | 70007                                  | 268306                                                                  | 35971.31                     | 632.6                         |
| Manipur                | 41220                                | 46295                                 | 481010                                                                 | 791                                   | 772                                    | 2480                                                                    | 16036.48                     | 307.74                        |
| Meghalaya              | 36326                                | 38828                                 | 1512205                                                                | 698                                   | 674                                    | 6122                                                                    | 12243.8                      | 235.26                        |
| Mizoram                | 16120                                | 17044                                 | 306787                                                                 | 84                                    | 86                                     | 427                                                                     | 14691.86                     | 76.56                         |
| Nagaland               | 13206                                | 13915                                 | 383920                                                                 | 410                                   | 423                                    | 2782                                                                    | 6674.75                      | 207.23                        |
| Odisha                 | 577736                               | 594332                                | 20182943                                                               | 2157                                  | 1989                                   | 15246                                                                   | 13764.07                     | 51.39                         |
| Punjab                 | 422429                               | 421946                                | 10421537                                                               | 10456                                 | 9990                                   | 57838                                                                   | 15226.32                     | 376.88                        |
| Rajasthan              | 634910                               | 633034                                | 16637039                                                               | 6157                                  | 5919                                   | 35662                                                                   | 9262.21                      | 89.82                         |
| Sikkim                 | 14575                                | 15696                                 | 218046                                                                 | 175                                   | 182                                    | 703                                                                     | 23870.86                     | 286.61                        |
| Tamil Nadu             | 1645335                              | 1726816                               | 40903538                                                               | 20358                                 | 19214                                  | 109652                                                                  | 22805.3                      | 282.17                        |
| Telangana              | 329792                               | 333956                                | 8438699                                                                | 2068                                  | 2005                                   | 11775                                                                   | 9421.64                      | 59.08                         |
| Tripura                | 32869                                | 35134                                 | 1214075                                                                | 291                                   | 271                                    | 2236                                                                    | 8946.58                      | 79.21                         |
| Uttar Pradesh          | 1105782                              | 1132551                               | 25351545                                                               | 13939                                 | 13930                                  | 69963                                                                   | 5534.1                       | 69.76                         |
| Uttarakhand            | 244199                               | 253662                                | 4885358                                                                | 5676                                  | 5771                                   | 27475                                                                   | 24210.98                     | 562.74                        |
| West Bengal            | 931107                               | 958952                                | 24747185                                                               | 7556                                  | 7329                                   | 43904                                                                   | 10200.99                     | 82.78                         |
| India                  | 19690200                             | 19890297                              | 2.61E+08                                                               | 245824                                | 236813                                 | 850612                                                                  | 14683.22                     | 183.31                        |

**Table T3: Summary of the different metrics for the states and the nation for waves 1 and 2 combined, on 30th June 2021**

| <b>Place</b>           | <b>Reported Cases (Observed)</b> | <b>Reported Cases (Predicted)</b> | <b>Total (reported + unreported) Cases (Predicted)</b> | <b>Reported Deaths (Observed)</b> | <b>Reported Deaths (Predicted)</b> | <b>Total (reported + unreported) Deaths (Predicted)</b> | <b>Cases per million</b> | <b>Deaths per million</b> |
|------------------------|----------------------------------|-----------------------------------|--------------------------------------------------------|-----------------------------------|------------------------------------|---------------------------------------------------------|--------------------------|---------------------------|
| Andaman and Nicobar    | 6589                             | 7509                              | 442215                                                 | 88                                | 125                                | 1205                                                    | 19614.74                 | 336.33                    |
| Andhra Pradesh         | 1435447                          | 1934160                           | 62678653                                               | 9372                              | 12529                              | 94741                                                   | 38188.8                  | 257.03                    |
| Arunachal Pradesh      | 21803                            | 37472                             | 1345763                                                | 81                                | 169                                | 1081                                                    | 26138.83                 | 127.19                    |
| Assam                  | 328526                           | 526932                            | 11992629                                               | 2184                              | 4489                               | 28614                                                   | 16376.5                  | 146.8                     |
| Bihar                  | 651888                           | 725024                            | 11736876                                               | 3831                              | 9210                               | 43607                                                   | 6935.93                  | 92.12                     |
| Chandigarh             | 55352                            | 62637                             | 952040                                                 | 635                               | 798                                | 3202                                                    | 58415.84                 | 765.55                    |
| Chhattisgarh           | 912468                           | 1010026                           | 16398535                                               | 11734                             | 13290                              | 55184                                                   | 38933.66                 | 526.13                    |
| Dadra and Nagar Haveli | 9515                             | 10768                             | 454789                                                 | 4                                 | 4                                  | 47                                                      | 17795.56                 | 6.82                      |
| Delhi                  | 1393747                          | 1441171                           | 32298170                                               | 21504                             | 24787                              | 130217                                                  | 85427.99                 | 1487.86                   |
| Goa                    | 135851                           | 170231                            | 2859657                                                | 2099                              | 3007                               | 12255                                                   | 114401.7                 | 2097.98                   |
| Gujarat                | 752544                           | 833680                            | 10679538                                               | 9114                              | 9771                               | 32345                                                   | 13621.97                 | 166.45                    |
| Haryana                | 694384                           | 777555                            | 12730020                                               | 6685                              | 9328                               | 39434                                                   | 30319.04                 | 372.45                    |
| Jammu and Kashmir      | 244553                           | 318175                            | 19729485                                               | 3147                              | 4176                               | 56408                                                   | 25753.25                 | 352.73                    |
| Jharkhand              | 315475                           | 344779                            | 5416772                                                | 4479                              | 5052                               | 21376                                                   | 10477.64                 | 154.97                    |
| Karnataka              | 2203361                          | 2894757                           | 45086526                                               | 21841                             | 34645                              | 138979                                                  | 46593.2                  | 575.13                    |
| Kerala                 | 2147727                          | 3056730                           | 30106773                                               | 6427                              | 13087                              | 39387                                                   | 87815.65                 | 399.42                    |
| Ladakh                 | 16439                            | 20791                             | 312589                                                 | 165                               | 203                                | 851                                                     | 73306.57                 | 737.22                    |
| Madhya Pradesh         | 731319                           | 795440                            | 11105810                                               | 6988                              | 8777                               | 31707                                                   | 10873.3                  | 123.64                    |
| Maharashtra            | 5378150                          | 6012954                           | 70329824                                               | 81475                             | 118981                             | 375785                                                  | 54003.89                 | 1087.16                   |
| Manipur                | 39722                            | 74721                             | 1268097                                                | 578                               | 1131                               | 4719                                                    | 27345.27                 | 452.08                    |
| Meghalaya              | 23284                            | 51570                             | 2008222                                                | 320                               | 809                                | 7248                                                    | 16866.82                 | 284.47                    |
| Mizoram                | 8678                             | 21532                             | 544060                                                 | 24                                | 95                                 | 525                                                     | 18676.53                 | 84.76                     |
| Nagaland               | 18039                            | 25501                             | 699709                                                 | 203                               | 506                                | 3288                                                    | 12768.75                 | 248.68                    |
| Odisha                 | 612220                           | 916932                            | 21813270                                               | 2366                              | 3871                               | 19119                                                   | 21746.87                 | 98.06                     |
| Punjab                 | 497663                           | 598213                            | 11975025                                               | 11891                             | 15660                              | 73530                                                   | 21472                    | 579.27                    |
| Rajasthan              | 859576                           | 928736                            | 18333372                                               | 6777                              | 8471                               | 41231                                                   | 13893.84                 | 130.17                    |
| Sikkim                 | 11424                            | 21832                             | 395174                                                 | 205                               | 317                                | 1580                                                    | 33867.96                 | 504.44                    |
| Tamil Nadu             | 1598092                          | 2569474                           | 46870171                                               | 17669                             | 31592                              | 139771                                                  | 34425.18                 | 453.43                    |
| Telangana              | 528216                           | 621635                            | 10064462                                               | 2949                              | 3565                               | 15201                                                   | 17819.59                 | 104.76                    |
| Tripura                | 40813                            | 67185                             | 2015217                                                | 428                               | 645                                | 4367                                                    | 18023.27                 | 184.82                    |
| Uttar Pradesh          | 1619541                          | 1716724                           | 29190121                                               | 17546                             | 22348                              | 89694                                                   | 8538.41                  | 113.09                    |
| Uttarakhand            | 287279                           | 348028                            | 7032861                                                | 4811                              | 7380                               | 36130                                                   | 33741.64                 | 725.73                    |
| West Bengal            | 1133393                          | 1507932                           | 27918472                                               | 13281                             | 17064                              | 65296                                                   | 16445.76                 | 194.23                    |
| India                  | 24963227                         | 30403185                          | 3.81E+08                                               | 273779                            | 386291                             | 1400992                                                 | 22706.06                 | 298.47                    |

**Table T4: Parameter values and descriptions for the SEIR-fansy model.**

| Parameter      | Value                 | Description                                                                                                                                                                                                                                                                                                                                                                                                                                                                       |
|----------------|-----------------------|-----------------------------------------------------------------------------------------------------------------------------------------------------------------------------------------------------------------------------------------------------------------------------------------------------------------------------------------------------------------------------------------------------------------------------------------------------------------------------------|
|                | <i>Time-varying</i>   | Rate of infectious transmission by infected, tested individuals with false negative results.                                                                                                                                                                                                                                                                                                                                                                                      |
| p              | 0.5                   | Ratio of rate of spread of infection by tested positive patients to that by false negatives. $p < 1$ represents the scenario where individuals who test positive are infecting susceptible individuals at a lower rate than infected individuals with false negative test results.                                                                                                                                                                                                |
| u              | 0.5                   | Scaling factor for the rate of spread of infection by untested individuals. u is assumed to be $< 1$ as U mostly consists of asymptomatic or mildly symptomatic cases who are known to spread the disease at a much lower rate than those with higher levels of symptoms.                                                                                                                                                                                                         |
| De             | 5.2                   | Incubation period (in days).                                                                                                                                                                                                                                                                                                                                                                                                                                                      |
| Dr             | 17.8                  | Means number of days until recovery for infected individuals.                                                                                                                                                                                                                                                                                                                                                                                                                     |
| Dt             | 0                     | Mean number of days for the test result to come after a person is tested. Under the assumption of instantaneous test results, this is taken to be zero.                                                                                                                                                                                                                                                                                                                           |
| c              | 0.0562                | Death rate attributable to COVID-19 which is equivalent to inverse of the average number of days for death starting from the onset of disease times the probability of death of an infected individual.                                                                                                                                                                                                                                                                           |
| $\lambda, \mu$ | $3.95 \times 10^{-5}$ | Natural birth and death rates (assumed to be equal).                                                                                                                                                                                                                                                                                                                                                                                                                              |
| r              | <i>Time-varying</i>   | Probability of being tested for infectious individuals.                                                                                                                                                                                                                                                                                                                                                                                                                           |
| f              | 0.15                  | Probability of a false negative RT-PCR diagnostic test result.                                                                                                                                                                                                                                                                                                                                                                                                                    |
| 1, 12          | 0.6 (1)<br>0.7 (2)    | Scaling factors for rate of recovery for undetected and false negative individuals respectively. Both 1 and 2 are assumed to be less than 1. It is assumed that the recovery rate is slower than the detected ones for the False Negative ones because they are not getting any hospital treatments. The condition of Untested individuals is not so severe as they consist of mostly asymptomatic people. So, they are assumed to recover faster than the Current Positive Ones. |
| 1, 12          | 0.3 (1)<br>0.7 (2)    | Scaling factors for death rate for undetected and false negative individuals respectively. Both 1 and 2 are assumed to be less than 1. Same as before, the death rate for False Negative ones are assumed to be higher than the Current detected Positive as they are not receiving proper treatment. While, for the Untested ones, the death rate is taken to be lesser because they are mostly asymptomatic. So, their probability of dying is much less.                       |

**Table T5: Comparison of 4th nationwide serosurvey to combined estimates across waves 1 and 2.**

| States           | 4th Nationwide Serosurvey, 31 May 2021 <sup>1</sup> |                            |                           |                       | Model-Based Estimates, 30 June 2021 |                |                        |                                                             |
|------------------|-----------------------------------------------------|----------------------------|---------------------------|-----------------------|-------------------------------------|----------------|------------------------|-------------------------------------------------------------|
|                  | Seroprevalence (%)                                  | Estimated Cases (in Lakhs) | Reported Cases (in Lakhs) | Under Counting Factor | Estimated Cases                     | Reported Cases | Under Reporting Factor | Difference (Under Counting factor - Under Reporting factor) |
| Bihar            | 75.9                                                | 947                        | 7                         | 134                   | 11733035                            | 725024         | 16                     | 118                                                         |
| Uttar Pradesh    | 71                                                  | 1689                       | 17                        | 100                   | 29700720                            | 1716724        | 17                     | 83                                                          |
| Madhya Pradesh   | 79                                                  | 674                        | 8                         | 86                    | 11248345                            | 795440         | 14                     | 72                                                          |
| Jharkhand        | 61.2                                                | 236                        | 3                         | 70                    | 5494715                             | 344779         | 16                     | 54                                                          |
| Rajasthan        | 76.2                                                | 617                        | 9                         | 66                    | 18167796                            | 928736         | 20                     | 46                                                          |
| Gujarat          | 75.3                                                | 481                        | 8                         | 59                    | 11073822                            | 833680         | 13                     | 46                                                          |
| West Bengal      | 60.9                                                | 607                        | 14                        | 44                    | 28541606                            | 1507932        | 19                     | 25                                                          |
| Assam            | 50.3                                                | 179                        | 4                         | 44                    | 12843468                            | 526932         | 24                     | 20                                                          |
| Telangana        | 63.1                                                | 243                        | 6                         | 42                    | 10136279                            | 621635         | 16                     | 26                                                          |
| Odisha           | 68.1                                                | 316                        | 8                         | 41                    | 22332360                            | 916932         | 24                     | 17                                                          |
| Punjab           | 66.5                                                | 200                        | 6                         | 35                    | 11989926                            | 598213         | 20                     | 15                                                          |
| Jammu & Kashmir  | 63                                                  | 86                         | 3                         | 30                    | 19619546                            | 318175         | 62                     | -32                                                         |
| Tamil Nadu       | 69.2                                                | 539                        | 21                        | 26                    | 48926546                            | 2569474        | 19                     | 7                                                           |
| Uttarakhand      | 73.1                                                | 82                         | 3                         | 25                    | 7182789                             | 348028         | 21                     | 4                                                           |
| Himachal Pradesh | 62                                                  | 46                         | 2                         | 24                    | N/A                                 | N/A            | N/A                    | N/A                                                         |
| Chhattisgarh     | 74.6                                                | 220                        | 10                        | 23                    | 459405                              | 10768          | 43                     | -20                                                         |
| Haryana          | 60.1                                                | 169                        | 8                         | 22                    | 13080661                            | 777555         | 17                     | 5                                                           |
| Andhra Pradesh   | 70.2                                                | 378                        | 17                        | 22                    | 63562840                            | 1934160        | 33                     | -11                                                         |
| Karnataka        | 69.8                                                | 472                        | 26                        | 18                    | 46131203                            | 2894757        | 16                     | 2                                                           |
| Maharashtra      | 58                                                  | 714                        | 57                        | 12                    | 70307014                            | 6012954        | 12                     | 0                                                           |
| Kerala           | 44.4                                                | 159                        | 25                        | 6                     | 31342383                            | 3056730        | 10                     | -4                                                          |
| India            | 67.6                                                | 9265                       | 282                       | 33                    | 380801295                           | 30403185       | 13                     | 20                                                          |

N/A = Not available.

[1] Press Information Bureau, National Media Center. Briefing on COVID-19. July 20, 2021.



# Estimated first-wave (top) and second-wave (bottom) fatality rates associated with SARS-CoV-2 for states in India

Wave 1: April 1, 2020 – January 31, 2021. Wave 2: February 1, 2021 – June 30, 2021.

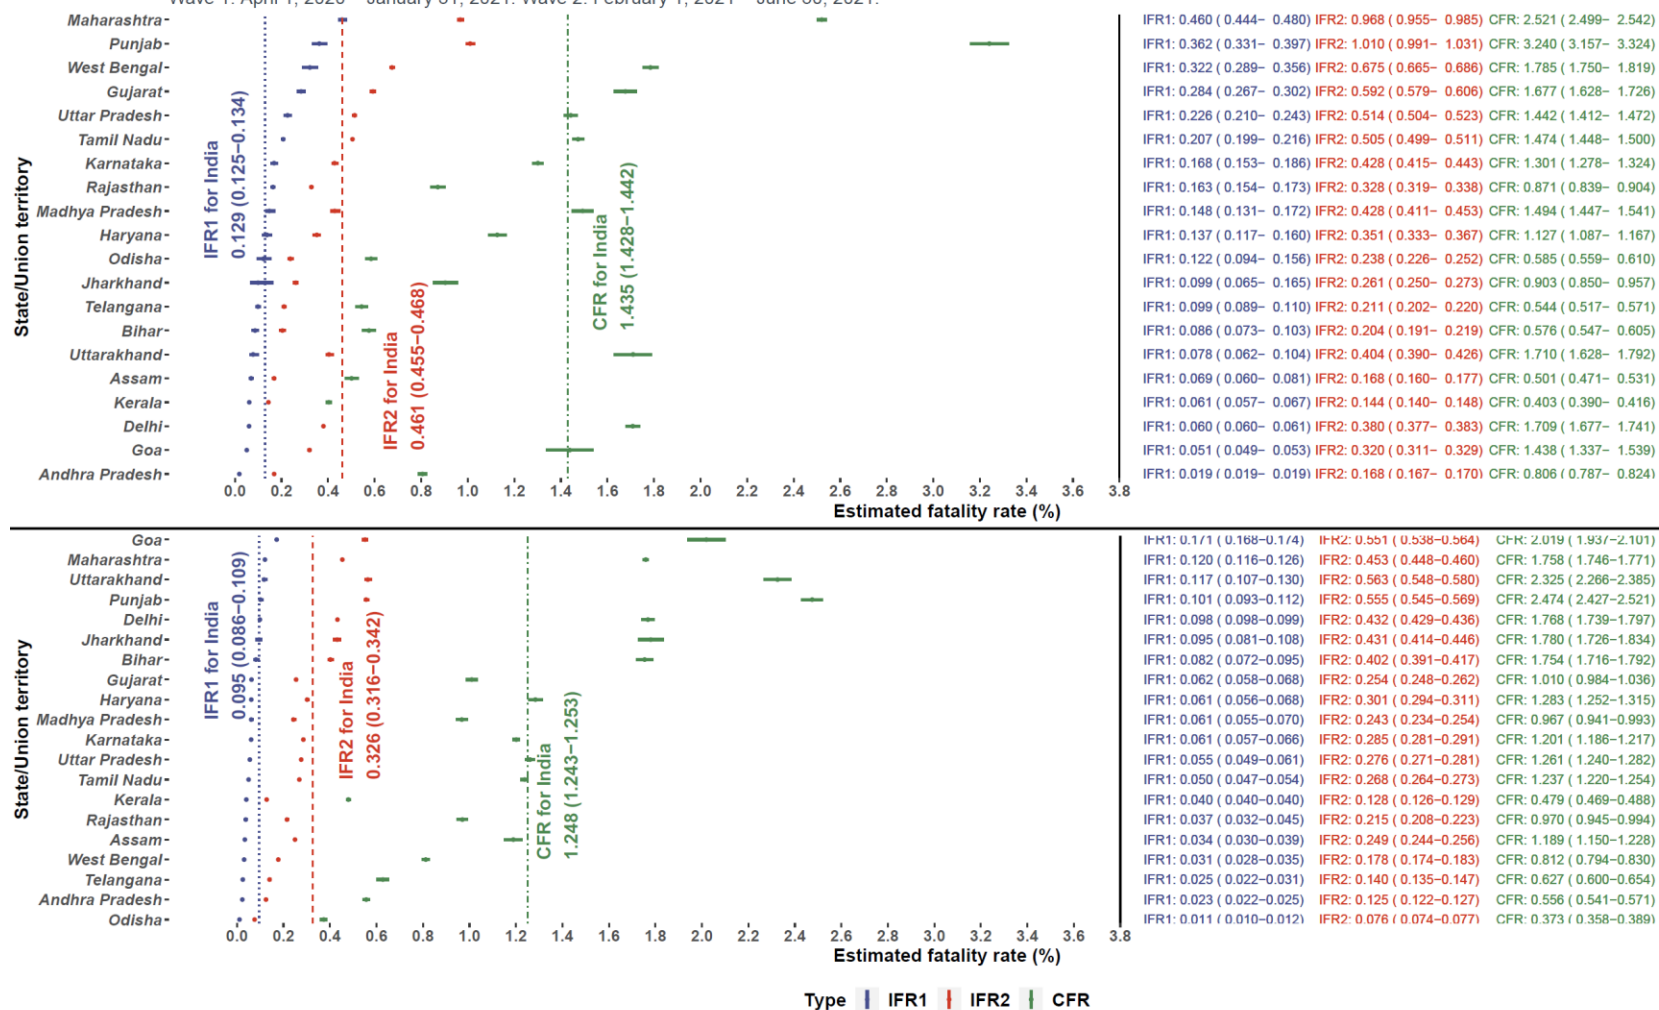

© COV-IND-19 Study Group  
Source: covid19india.org

Note:  
– Owing to lack of sufficient data, estimates for only twenty states with highest case counts have been presented.  
– Coloured blue for IFR<sub>1</sub>, red for IFR<sub>2</sub> and green for CFR values.

**Supplementary Figure 2.** Forest plot of wave 1 and wave 2 infection fatality rates (IFR) and case fatality ratios (CFR) for SARS-CoV-2 in various states in India, where IFR<sub>1</sub> includes reported deaths and IFR<sub>2</sub> further includes the estimate of unreported deaths.

# Estimated first-wave (top) and second-wave (bottom) underreporting factors associated with SARS-CoV-2 for states in India

Wave 1: April 1, 2020 – January 31, 2021. Wave 2: February 1, 2021 – June 30, 2021.

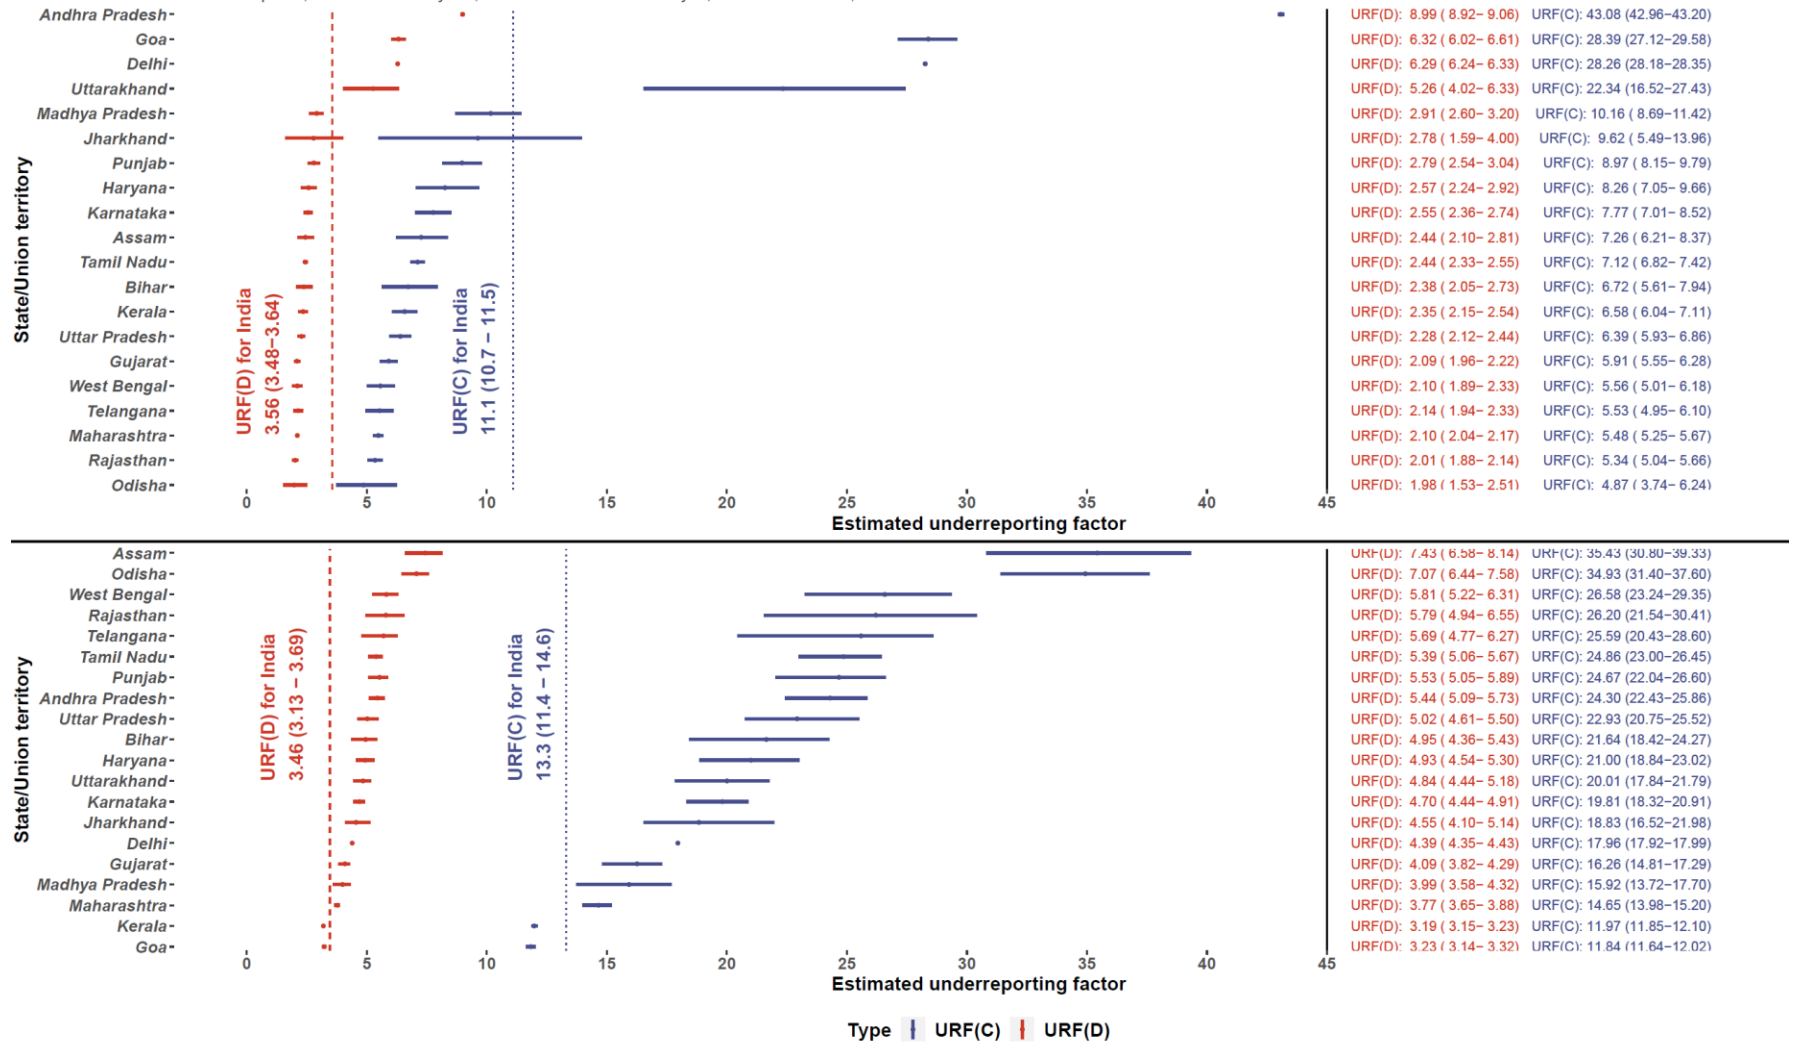

© COV-IND-19 Study Group

Source: covid19india.org

Note:

– Owing to lack of sufficient data, estimates for only twenty states with highest case counts have been presented.

– Coloured blue for URF(C) and red for URF(D) values.

**Supplementary Figure 3: Estimated first and second wave underreporting factors for cases and deaths associated with SARS-CoV-2 for states in India.**

## References

- [1] M. J. Page *et al.*, "The PRISMA 2020 statement: an updated guideline for reporting systematic reviews," *Syst. Rev.*, vol. 10, no. 1, p. 89, Mar. 2021, doi: 10.1186/s13643-021-01626-4.
- [2] O. Prakash *et al.*, "Assessing seropositivity for IgG antibodies against SARS-CoV-2 in Ahmedabad city of India: a cross-sectional study," *BMJ Open*, vol. 11, no. 1, p. e044101, Jan. 2021, doi: 10.1136/bmjopen-2020-044101.
- [3] L. R. Inbaraj, C. E. George, and S. Chandrasingh, "Seroprevalence of COVID-19 infection in a rural district of South India: A population-based seroepidemiological study," *PloS One*, vol. 16, no. 3, p. e0249247, 2021, doi: 10.1371/journal.pone.0249247.
- [4] J. S. Kshatri *et al.*, "Seroprevalence of SARS-CoV-2 in Bhubaneswar, India: findings from three rounds of community surveys," *Epidemiol. Infect.*, vol. 149, p. e139, Apr. 2021, doi: 10.1017/S0950268821000972.
- [5] J. S. Kshatri *et al.*, "Serological surveys to inform SARS-CoV-2 epidemic curve: a cross-sectional study from Odisha, India.," *Sci. Rep.*, vol. 11, no. 1, p. 10551, May 2021, doi: 10.1038/s41598-021-89877-y.
- [6] S. Selvaraju *et al.*, "Population-Based Serosurvey for Severe Acute Respiratory Syndrome Coronavirus 2 Transmission, Chennai, India.," *Emerg. Infect. Dis.*, vol. 27, no. 2, pp. 586–589, Feb. 2021, doi: 10.3201/eid2702.203938.
- [7] "Estimates of COVID-19 infection fatality rate in Chennai - Mathematics." <https://maths.mdx.ac.uk/research/modelling-the-covid-19-pandemic/chennaiifrestimates/> (accessed Aug. 14, 2021).
- [8] "A look at serological surveys conducted in Delhi," *Hindustan Times*, Feb. 02, 2021. <https://www.hindustantimes.com/cities/delhi-news/a-look-at-serological-surveys-conducted-in-delhi-101612270983224.html> (accessed Aug. 09, 2021).
- [9] P. Sharma *et al.*, "Seroprevalence of antibodies to SARS-CoV-2 and predictors of seropositivity among employees of a teaching hospital in New Delhi, India.," *Osong Public Health Res. Perspect.*, vol. 12, no. 2, pp. 88–95, Apr. 2021, doi: 10.24171/j.phrp.2021.12.2.06.
- [10] N. M. Babu, "Percentage of people with antibodies high, shows Delhi serological survey," *The Hindu*, New Delhi, Jul. 22, 2020. Accessed: Aug. 09, 2021. [Online]. Available: <https://www.thehindu.com/news/cities/Delhi/percentage-of-people-with-antibodies-high/article32156162.ece>
- [11] R. Bhattacharyya *et al.*, "Incorporating false negative tests in epidemiological models for SARS-CoV-2 transmission and reconciling with seroprevalence estimates.," *Sci. Rep.*, vol. 11, no. 1, p. 9748, May 2021, doi: 10.1038/s41598-021-89127-1.
- [12] D. K. Hazra *et al.*, "The INDSCI-SIM model for COVID-19 in India," *medRxiv*, p. 2021.06.02.21258203, Jun. 2021, doi: 10.1101/2021.06.02.21258203.
- [13] P. Misra, S. Kant, R. Guleria, S. K. Rai, and W. U. S. study team of Aiiims, "Serological prevalence of SARS-CoV-2 antibody among children and young age (between age 2-17 years) group in India: An interim result from a large multi-centric population-based seroepidemiological study," *medRxiv*, p. 2021.06.15.21258880, Jun. 2021, doi: 10.1101/2021.06.15.21258880.
- [14] C. E. George, L. R. Inbaraj, S. Chandrasingh, and L. P. de Witte, "High seroprevalence of COVID-19 infection in a large slum in South India; what does it tell us about managing a pandemic and beyond?," *Epidemiol. Infect.*, vol. 149, p. e39, Feb. 2021, doi: 10.1017/S0950268821000273.

- [15] M. Mohanan, A. Malani, K. Krishnan, and A. Acharya, "Prevalence of COVID-19 In Rural Versus Urban Areas in a Low-Income Country: Findings from a State-Wide Study in Karnataka, India," *medRxiv*, p. 2020.11.02.20224782, Nov. 2020, doi: 10.1101/2020.11.02.20224782.
- [16] G. R. Babu *et al.*, "The burden of active infection and anti-SARS-CoV-2 IgG antibodies in the general population: Results from a statewide sentinel-based population survey in Karnataka, India," *Int. J. Infect. Dis.*, vol. 108, pp. 27–36, Jul. 2021, doi: 10.1016/j.ijid.2021.05.043.
- [17] R. Cai, P. Novosad, V. Tandel, S. Asher, and A. Malani, "Representative Estimates of COVID-19 Infection Fatality Rates from Three Locations in India," *medRxiv*, Jan. 2021, doi: 10.1101/2021.01.05.21249264.
- [18] S. M. S. Khan *et al.*, "Results of a Population-Based Survey to Estimate the Seroprevalence of SARS-CoV-2 Specific IgG Antibodies in Kashmir, India, Seven Months after the Appearance of the First COVID-19 Case," Social Science Research Network, Rochester, NY, SSRN Scholarly Paper ID 3820632, Apr. 2021. doi: 10.2139/ssrn.3820632.
- [19] S. Sakalle *et al.*, "Seroprevalence of anti-SARS-CoV-2 antibodies in Indore, Madhya Pradesh: A community-based cross-sectional study, August 2020.," *J. Fam. Med. Prim. Care*, vol. 10, no. 3, pp. 1479–1484, Mar. 2021, doi: 10.4103/jfmpc.jfmpc\_2015\_20.
- [20] Tata Institute of Fundamental Research, "SARS-CoV2 Serological Survey in Mumbai by NITI-BMC-TIFR: Preliminary Report of Round-2." [https://www.tifr.res.in/TSN/article/Mumbai-Serosurvey%20Technical%20report-NITI\\_BMC-Round-2%20for%20TIFR%20website.pdf](https://www.tifr.res.in/TSN/article/Mumbai-Serosurvey%20Technical%20report-NITI_BMC-Round-2%20for%20TIFR%20website.pdf) (accessed Aug. 09, 2021).
- [21] S. Reporter, "Third sero survey: antibodies in 36.30% samples in Mumbai," *The Hindu*, Mumbai, Apr. 25, 2021. Accessed: Aug. 24, 2021. [Online]. Available: <https://www.thehindu.com/news/cities/mumbai/third-sero-survey-antibodies-in-3630-samples-in-mumbai/article34404107.ece>
- [22] A. Malani *et al.*, "Seroprevalence of SARS-CoV-2 in slums versus non-slums in Mumbai, India.," *Lancet Glob. Health*, vol. 9, no. 2, pp. e110–e111, Feb. 2021, doi: 10.1016/S2214-109X(20)30467-8.
- [23] M. Banaji, "Estimating COVID-19 infection fatality rate in Mumbai during 2020," *medRxiv*, p. 2021.04.08.21255101, Apr. 2021, doi: 10.1101/2021.04.08.21255101.
- [24] "PIB'S BULLETIN ON COVID-19." <https://pib.gov.in/pib.gov.in/Pressreleaseshare.aspx?PRID=1740000> (accessed Aug. 24, 2021).
- [25] M. V. Murhekar *et al.*, "SARS-CoV-2 seroprevalence among the general population and healthcare workers in India, December 2020–January 2021," *Int. J. Infect. Dis.*, vol. 108, pp. 145–155, Jul. 2021, doi: 10.1016/j.ijid.2021.05.040.
- [26] M. V. Murhekar *et al.*, "SARS-CoV-2 antibody seroprevalence in India, August–September, 2020: findings from the second nationwide household serosurvey," *Lancet Glob. Health*, vol. 9, no. 3, pp. e257–e266, Mar. 2021, doi: 10.1016/S2214-109X(20)30544-1.
- [27] M. V. Murhekar *et al.*, "Prevalence of SARS-CoV-2 infection in India: Findings from the national serosurvey, May-June 2020," *Indian J. Med. Res.*, vol. 152, no. 1, p. 48, Jan. 2020, doi: 10.4103/ijmr.IJMR\_3290\_20.
- [28] G.-A.-U. G.- Öffentlichkeitsarbeit, "COVID-19 - Georg-August-Universität Göttingen." <https://www.uni-goettingen.de/en/606540.html> (accessed Aug. 24, 2021).

- [29] S. Purkayastha *et al.*, "Estimating the wave 1 and wave 2 infection fatality rates from SARS-CoV-2 in India," *BMC Res. Notes*, vol. 14, no. 1, p. 262, Jul. 2021, doi: 10.1186/s13104-021-05652-2.
- [30] H. Campbell and P. Gustafson, "Inferring the COVID-19 IFR with a simple Bayesian evidence synthesis of seroprevalence study data and imprecise mortality data," *medRxiv*, p. 2021.05.12.21256975, May 2021, doi: 10.1101/2021.05.12.21256975.
- [31] R. Bhaduri, R. Kundu, S. Purkayastha, M. Kleinsasser, L. J. Beesley, and B. Mukherjee, "Extending the Susceptible-Exposed-Infected-Removed (SEIR) model to handle the high false negative rate and symptom-based administration of COVID-19 diagnostic tests: SEIR-fansy," *medRxiv*, p. 2020.09.24.20200238, Sep. 2020, doi: 10.1101/2020.09.24.20200238.
- [32] A. Banerjee *et al.*, "SARS-CoV-2 Seroprevalence Study in Pimpri-Chinchwad, Maharashtra, India Coinciding with Falling Trend – Do the Results Suggest Imminent Herd Immunity?," Social Science Research Network, Rochester, NY, SSRN Scholarly Paper ID 3729394, Nov. 2020. doi: 10.2139/ssrn.3729394.
- [33] S. Goli and K. S. James, "How much of SARS-CoV-2 Infections is India detecting? A model-based estimation," *medRxiv*, p. 2020.04.09.20059014, Apr. 2020, doi: 10.1101/2020.04.09.20059014.
- [34] S. S. Kar, S. Sarkar, S. Murali, R. Dhodapkar, N. M. Joseph, and R. Aggarwal, "Prevalence and Time Trend of SARS-CoV-2 Infection in Puducherry, India, August–October 2020," *Emerg. Infect. Dis.*, vol. 27, no. 2, pp. 666–669, Feb. 2021, doi: 10.3201/eid2702.204480.
- [35] A. Malani *et al.*, "SARS-CoV-2 Seroprevalence in Tamil Nadu in October-November 2020," *medRxiv*, p. 2021.02.03.21250949, Apr. 2021, doi: 10.1101/2021.02.03.21250949.
- [36] A. Joshi *et al.*, "Heterogeneous patterns of COVID-19 transmission in an Urban set up – sero-epidemiological survey data from Ujjain, Madhya Pradesh (a central Indian city)," *Data Brief*, vol. 37, p. 107169, Aug. 2021, doi: 10.1016/j.dib.2021.107169.
- [37] M. I. Nisar *et al.*, "Serial population-based serosurveys for COVID-19 in two neighbourhoods of Karachi, Pakistan.," *Int. J. Infect. Dis. IJID Off. Publ. Int. Soc. Infect. Dis.*, vol. 106, pp. 176–182, May 2021, doi: 10.1016/j.ijid.2021.03.040.
- [38] M. Haq *et al.*, "SARS-CoV-2: big seroprevalence data from Pakistan-is herd immunity at hand?," *Infection*, pp. 1–6, May 2021, doi: 10.1007/s15010-021-01629-2.
- [39] M. G. Ahamad, F. Tanin, B. Talukder, and M. U. Ahmed, "Officially Confirmed COVID-19 and Unreported COVID-19–Like Illness Death Counts: An Assessment of Reporting Discrepancy in Bangladesh," *Am. J. Trop. Med. Hyg.*, vol. 104, no. 2, pp. 546–548, Feb. 2021, doi: 10.4269/ajtmh.20-1205.
- [40] M. G. Ahamad and F. Tanin, "Confirmed and Unreported COVID-19 Death Counts: An Assessment of Reporting Discrepancy," Jul. 2020, doi: 10.1101/2020.07.20.20158139.
- [41] M. A. A. Al-Bari, S. Hossain, and M. K.-E. Zahan, "Exploration of sex-specific and age-dependent COVID-19 fatality rate in Bangladesh population.," *World J. Radiol.*, vol. 13, no. 1, pp. 1–18, Jan. 2021, doi: 10.4329/wjr.v13.i1.1.
- [42] P. Barnwal *et al.*, "No excess mortality detected in rural Bangladesh in 2020 from repeated surveys of a population of 81,000," May 2021, doi: 10.1101/2021.05.07.21256865.
- [43] S. K. Dey, M. M. Rahman, U. R. Siddiqi, and A. Howlader, "Exploring Epidemiological Behavior of Novel Coronavirus (COVID-19) Outbreak in Bangladesh.," *SN Compr. Clin. Med.*, pp. 1–9, Aug. 2020, doi: 10.1007/s42399-020-00477-9.
- [44] M. J. Hasan *et al.*, "Clinico-epidemiological characteristics of asymptomatic and symptomatic COVID-19-positive patients in Bangladesh," *medRxiv*, p. 2020.08.18.20177089, Aug. 2020, doi: 10.1101/2020.08.18.20177089.

- [45] A. Islam, M. A. Sayeed, M. K. Rahman, J. Ferdous, S. Islam, and M. M. Hassan, "Geospatial dynamics of COVID-19 clusters and hotspots in Bangladesh.," *Transbound. Emerg. Dis.*, Jan. 2021, doi: 10.1111/tbed.13973.
- [46] A. Islam *et al.*, "Spatiotemporal patterns and trends of community transmission of the pandemic COVID-19 in South Asia: Bangladesh as a case study.," *Biosaf. Health*, vol. 3, no. 1, pp. 39–49, Feb. 2021, doi: 10.1016/j.bsheal.2020.09.006.
- [47] A. U. Khan, A. H. M. Musleh Uddin, F. U. Khan, S. Khanom, and A. U. Khan, "COVID-19: Current Status in Bangladesh," Jun. 2020, doi: 10.2139/ssrn.3634891.
- [48] A. M. M. Mukaddes, M. Sannyal, Q. Ali, and M. T. Kuhel, "Transmission Dynamics of COVID-19 in Bangladesh - A Compartmental Modeling Approach," Jun. 2020, doi: 10.2139/ssrn.3644855.
- [49] Md. R. Rahman, A. H. M. H. Islam, and Md. N. Islam, "Geospatial modelling on the spread and dynamics of 154 day outbreak of the novel coronavirus (COVID-19) pandemic in Bangladesh towards vulnerability zoning and management approaches," *Model. Earth Syst. Environ.*, Sep. 2020, doi: 10.1007/s40808-020-00962-z.
- [50] M. H. B. Siam, M. M. Hasan, S. M. Tashrif, M. H. Rahaman Khan, E. Raheem, and M. S. Hossain, "Insights into the first seven-months of COVID-19 pandemic in Bangladesh: lessons learned from a high-risk country.," *Heliyon*, vol. 7, no. 6, p. e07385, Jun. 2021, doi: 10.1016/j.heliyon.2021.e07385.
- [51] T. W. Russell *et al.*, "Reconstructing the early global dynamics of under-ascertained COVID-19 cases and infections.," *BMC Med.*, vol. 18, no. 1, p. 332, Oct. 2020, doi: 10.1186/s12916-020-01790-9.
- [52] E. A. Rana *et al.*, "Molecular detection and prevalence of SARS-CoV-2 during the early outbreak in Southern Bangladesh," *Int. J. One Health*, vol. 6, no. 2, pp. 153–159, 2020, doi: 10.14202/IJOH.2020.153-159.
- [53] V. S. B. Adapa, S. S. Adapa, and H. Narni, "Andhra Pradesh's COVID-19 Pandemic Case Fatality Rate," Jan. 2021, doi: 10.2139/ssrn.3776490.
- [54] V. S. B. Adapa, S. S. Adapa, and H. Narni, "COVID-19 Pandemic India's Case Fatality Rate," Oct. 2020, doi: 10.2139/ssrn.3687357.
- [55] M. Al-arydah, H. W. Berhe, K. Dib, and K. Madhu, "Mathematical Modelling of the Spread of the Coronavirus under Social Restrictions," *medRxiv*, p. 2020.09.14.20194068, Sep. 2020, doi: 10.1101/2020.09.14.20194068.
- [56] E. S. Asirvatham, J. Lakshmanan, C. J. Sarman, and M. Joy, "Demystifying the varying case fatality rates (CFR) of COVID-19 in India: Lessons learned and future directions," *J. Infect. Dev. Ctries.*, vol. 14, no. 10, Art. no. 10, Oct. 2020, doi: 10.3855/jidc.13340.
- [57] R. Cai, P. M. Novosad, V. Tandel, S. Asher, and A. Malani, "Representative Estimates of COVID-19 Age-Specific Infection Fatality Rates from Four Locations in India: A Cross-Sectional Observational Study," Feb. 2021, doi: 10.2139/ssrn.3783787.
- [58] P. Chatterjee, "Is India missing COVID-19 deaths?," *Lancet Lond. Engl.*, vol. 396, no. 10252, p. 657, Sep. 2020, doi: 10.1016/S0140-6736(20)31857-2.
- [59] S. Chatterjee, A. Sarkar, M. Karmakar, S. Chatterjee, and R. Paul, "SEIRD model to study the asymptomatic growth during COVID-19 pandemic in India.," *Indian J. Phys. Proc. Indian Assoc. Cultiv. Sci.* 2004, pp. 1–13, Nov. 2020, doi: 10.1007/s12648-020-01928-8.
- [60] I. Frost *et al.*, "Risks to Children under-five in India from COVID-19," *medRxiv*, p. 2020.05.18.20105239, May 2020, doi: 10.1101/2020.05.18.20105239.

- [61] N. Gonzalez Garcia *et al.*, "Título: COVID-19 pediatric mortality rates are heterogeneous between countries," Sep. 2020, doi: 10.1101/2020.09.17.20196832.
- [62] M. K. Gupta, P. Bhardwaj, A. D. Goel, S. Saurabh, and S. Misra, "Trends of Epidemiological and Demographic Indicators of COVID-19 in India.," *J. Infect. Dev. Ctries.*, vol. 15, no. 5, pp. 618–624, May 2021, doi: 10.3855/jidc.13243.
- [63] S. Gupta, "The age and sex distribution of COVID-19 cases and fatalities in India," *medRxiv*, p. 2020.07.14.20153957, Jul. 2020, doi: 10.1101/2020.07.14.20153957.
- [64] N. Jahan *et al.*, "Entry and initial spread of COVID-19 in India: Epidemiological analysis of media surveillance data, India, 2020.," *Clin. Epidemiol. Glob. Health*, vol. 9, pp. 347–354, Mar. 2021, doi: 10.1016/j.cegh.2020.10.008.
- [65] S. Kumar, R. Kumar, S. Momani, and S. Hadid, "A study on fractional COVID-19 disease model by using Hermite wavelets," *Math. Methods Appl. Sci.*, vol. n/a, no. n/a, doi: 10.1002/mma.7065.
- [66] M. S. Kumar *et al.*, "National sero-surveillance to monitor the trend of SARS-CoV-2 infection transmission in India: Protocol for community-based surveillance.," *Indian J. Med. Res.*, vol. 151, no. 5, pp. 419–423, May 2020, doi: 10.4103/ijmr.IJMR\_1818\_20.
- [67] A. Menon, N. K. Rajendran, A. Chandrachud, and G. Setlur, "Modelling and simulation of COVID-19 propagation in a large population with specific reference to India," *medRxiv*, p. 2020.04.30.20086306, May 2020, doi: 10.1101/2020.04.30.20086306.
- [68] S. K. Mohanty, U. Sahoo, U. S. Mishra, and M. Dubey, "Age Pattern of Premature Mortality under varying scenarios of COVID-19 Infection in India," *medRxiv*, p. 2020.06.11.20128587, Jun. 2020, doi: 10.1101/2020.06.11.20128587.
- [69] S. Mukhopadhyay and D. Chakraborty, "Estimation of undetected COVID-19 infections in India," May 2020, doi: 10.1101/2020.04.20.20072892.
- [70] S. Naushin *et al.*, "Insights from a Pan India Sero-Epidemiological survey (Phenome-India Cohort) for SARS-CoV2," *eLife*, vol. 10, p. e66537, Apr. 2021, doi: 10.7554/eLife.66537.
- [71] D. Neve, H. Patel, and H. S. Dhiman, "On Modeling of COVID-19 for the Indian Subcontinent using Polynomial and Supervised Learning Regression," *medRxiv*, p. 2020.10.14.20212563, Oct. 2020, doi: 10.1101/2020.10.14.20212563.
- [72] D. Parai *et al.*, "Seroprevalence of anti-SARS-CoV-2 IgG antibody among health care workers of anaesthesia departments from various hospital settings in India," Mar. 2021, doi: 10.1101/2021.03.20.21253819.
- [73] M. Radha and S. Balamuralitharan, "A study on COVID-19 transmission dynamics: stability analysis of SEIR model with Hopf bifurcation for effect of time delay.," *Adv. Differ. Equ.*, vol. 2020, no. 1, p. 523, 2020, doi: 10.1186/s13662-020-02958-6.
- [74] R. Ranjan, A. Sharma, and M. K. Verma, "Characterization of the Second Wave of COVID-19 in India," *medRxiv*, p. 2021.04.17.21255665, Apr. 2021, doi: 10.1101/2021.04.17.21255665.
- [75] J. S and S. Sreedharan, "Analysing the Covid-19 Cases in Kerala: a Visual Exploratory Data Analysis Approach.," *SN Compr. Clin. Med.*, pp. 1–12, Aug. 2020, doi: 10.1007/s42399-020-00451-5.
- [76] P. P. Singh *et al.*, "Estimation of real-infection and immunity against SARS-CoV-2 in Indian populations," *medRxiv*, p. 2021.02.05.21251118, Apr. 2021, doi: 10.1101/2021.02.05.21251118.
- [77] A. K. Srivastav, M. Ghosh, and S. R. Bandekar, "Modeling of COVID-19 with limited public health resources: a comparative study of three most affected countries.," *Eur. Phys. J. Plus*, vol. 136, no. 4, p. 359, 2021, doi: 10.1140/epjp/s13360-021-01333-y.

- [78] V. Tamrakar *et al.*, "District level correlates of COVID-19 pandemic in India," Oct. 2020, doi: 10.1101/2020.10.08.20208447.
- [79] J. Unnikrishnan, S. Mangalathu, and R. V. Kutty, "Estimating under-reporting of COVID-19 cases in Indian states: an approach using a delay-adjusted case fatality ratio.," *BMJ Open*, vol. 11, no. 1, p. e042584, Jan. 2021, doi: 10.1136/bmjopen-2020-042584.
- [80] P. Venkatesan, "Estimate of COVID-19 case prevalence in India based on surveillance data of patients with severe acute respiratory illness," *medRxiv*, p. 2020.04.14.20065342, Apr. 2020, doi: 10.1101/2020.04.14.20065342.
- [81] Y. Wang *et al.*, "Estimating the Prevalence and Mortality of Coronavirus Disease 2019 (COVID-19) in the USA, the UK, Russia, and India.," *Infect. Drug Resist.*, vol. 13, pp. 3335–3350, 2020, doi: 10.2147/IDR.S265292.
- [82] A. K. Yadav, S. Ghosh, A. Kotwal, S. Kumar, and S. Bobdey, "Serial antibody response among hospitalized coronavirus disease 2019 cases in India.," *Med. J. Armed Forces India*, Nov. 2020, doi: 10.1016/j.mjafi.2020.09.010.
- [83] A. A. Z. Ansari *et al.*, "Prevalence and cross states comparison of case fatality rate and recovery rate of COVID 19/SARS-COV-2 in India," *J. Fam. Med. Prim. Care*, vol. 10, no. 1, pp. 475–480, Jan. 2021, doi: 10.4103/jfmpc.jfmpc\_1088\_20.
- [84] P. Abraham *et al.*, "Laboratory surveillance for SARS-CoV-2 in India: Performance of testing & descriptive epidemiology of detected COVID-19, January 22 - April 30, 2020," *Indian J. Med. Res.*, vol. 151, no. 5, pp. 424–437, May 2020, doi: 10.4103/ijmr.IJMR\_1896\_20.
- [85] R. Giri, A. Kumar, M. Saini, and R. K. Sharma, "Living with the virus: Infection and epidemiology of COVID-19 in hotspot area of India.," *J. Public Aff.*, p. e2651, Feb. 2021, doi: 10.1002/pa.2651.
- [86] M. R. T. Shah, T. Ahammed, A. Anjum, A. A. Chowdhury, and A. J. Suchana, "Finding the real COVID-19 case-fatality rates for SAARC countries.," *Biosaf. Health*, vol. 3, no. 3, pp. 164–171, Jun. 2021, doi: 10.1016/j.bsheal.2021.03.002.
- [87] J. J. M. Wong *et al.*, "Comparative Analysis of Pediatric COVID-19 Infection in Southeast Asia, South Asia, Japan, and China.," *Am. J. Trop. Med. Hyg.*, Jun. 2021, doi: 10.4269/ajtmh.21-0299.
- [88] A. Zaveri and P. Chouhan, "Are child and youth population at lower risk of COVID-19 fatalities? Evidences from South-East Asian and European countries," *Child. Youth Serv. Rev.*, vol. 119, p. 105360, Dec. 2020, doi: 10.1016/j.childyouth.2020.105360.
- [89] R. Bhattacharyya, R. Bhaduri, R. Kundu, M. Salvatore, and B. Mukherjee, "Reconciling epidemiological models with misclassified case-counts for SARS-CoV-2 with seroprevalence surveys: A case study in Delhi, India," Aug. 2020, doi: 10.1101/2020.07.31.20166249.
- [90] P. Chauhan, A. Kumar, and P. Jamdagni, "Regression Analysis of COVID-19 Spread in India and its Different States," *medRxiv*, p. 2020.05.29.20117069, May 2020, doi: 10.1101/2020.05.29.20117069.
- [91] B. S. K. Meghana and V. Kakulapati, "State-wise prevalence of COVID 19 in India by using machine learning approaches," *Int. J. Pharm. Res.*, vol. 12, no. (Meghana B.S.K., meghanasharma224@gmail.com) Chaitanya Bharathi Institute of Technology, Gandipet, Hyderabad, Telangana, India, pp. 2855–2859, 2020, doi: 10.31838/ijpr/2020.SP2.295.
- [92] B. Mukherjee, S. Purkayashtha, R. Kundu, and R. Bhaduri, "Estimating the Infection Fatality Rate from SARS-CoV-2 in India," Mar. 2021, doi: 10.2139/ssrn.3798552.
- [93] S. Purkayastha *et al.*, "A comparison of five epidemiological models for transmission of SARS-CoV-2 in India.," *BMC Infect. Dis.*, vol. 21, no. 1, p. 533, Jun. 2021, doi: 10.1186/s12879-021-06077-9.



- [94] V. Patel, C. McCarthy, R. A. Taylor, R. Moir, L. A. Kelly, and E. L. Snary, "An improved methodology for estimating the prevalence of SARS-CoV-2," *medRxiv*, p. 2020.08.04.20168187, Aug. 2020, doi: 10.1101/2020.08.04.20168187.
- [95] A. Velumani *et al.*, "SARS-CoV-2 Seroprevalence in 12 Cities of India from July-December 2020," *medRxiv*, p. 2021.03.19.21253429, Mar. 2021, doi: 10.1101/2021.03.19.21253429.
- [96] N. Gupta *et al.*, "Severe acute respiratory illness surveillance for coronavirus disease 2019, India, 2020," *Indian J. Med. Res.*, vol. 151, no. 2–3, pp. 236–240, 2020, doi: 10.4103/ijmr.IJMR\_1035\_20.
- [97] O. Prakash, B. Solanki, J. K. Sheth, M. Kadam, and S. Vyas, "Severe acute respiratory syndrome coronavirus 2 immunoglobulin G antibody: Seroprevalence among contacts of COVID-19 cases.," *Indian J. Public Health*, vol. 65, no. 1, pp. 5–10, Mar. 2021, doi: 10.4103/ijph.IJPH\_1199\_20.
- [98] M. Mahto, B. Biswas, A. Banerjee, S. Kumar, N. Agarwal, and P. K. Singh, "Igg seropositivity for sars-cov-2 and its predictors among healthcare workers of Eastern India," *Indian J. Hematol. Blood Transfus.*, vol. 36, no. 1 SUPPL, p. S112, 2020, doi: 10.1007/s12288-020-01384-8.
- [99] A. Malani, M. Mohanan, C. Kumar, J. Kramer, and V. Tandel, "Prevalence of SARS-CoV-2 among workers returning to Bihar gives snapshot of COVID across India," Jun. 2020, doi: 10.1101/2020.06.26.20138545.
- [100] M. Madhusudan, J. Sankar, K. Dhanalakshmi, S. Putlibai, and S. Balasubramanian, "Seroprevalence to SARS-CoV-2 Among Healthcare Workers in an Exclusive Pediatric Hospital.," *Indian Pediatr.*, vol. 58, no. 3, pp. 279–280, Mar. 2021, doi: 10.1007/s13312-021-2170-1.
- [101] M. Pons-Salort *et al.*, "Reconstructing the COVID-19 epidemic in Delhi, India: infection attack rate and reporting of deaths," *medRxiv*, p. 2021.03.23.21254092, Mar. 2021, doi: 10.1101/2021.03.23.21254092.
- [102] S. Siddiqui *et al.*, "SARS-CoV-2 Antibody Seroprevalence and Stability in a Tertiary Care Hospital-Setting," Oct. 2020, doi: 10.2139/ssrn.3696827.
- [103] R. Thiruvengadam *et al.*, "Longitudinal Serology of SARS-CoV-2-Infected Individuals in India: A Prospective Cohort Study.," *Am. J. Trop. Med. Hyg.*, May 2021, doi: 10.4269/ajtmh.21-0164.
- [104] J. Kaushal and P. Mahajan, "Asia's largest urban slum-Dharavi: A global model for management of COVID-19.," *Cities Lond. Engl.*, vol. 111, p. 103097, Apr. 2021, doi: 10.1016/j.cities.2020.103097.
- [105] M. Mishra, R. Chaudhry, F. Rana, D. S. Nag, and S. Rai, "Serosurveillance of Health Care Workers in a COVID Hospital: Immune Response, and Its Longevity.," *Cureus*, vol. 13, no. 3, p. e14020, Mar. 2021, doi: 10.7759/cureus.14020.
- [106] S. Kataria *et al.*, "Is Covid-19 seroprevalence different in health care workers as per their risk of exposure? A study from a tertiary care hospital in National Capital Region of India," Feb. 2021, doi: 10.1101/2021.02.10.21251543.
- [107] S. Ranjan, A. Kaur, and R. Thakur, "Gendered Differentials in Symptoms, Morbidity, and Case Fatality Rate in COVID-19 Pandemic in India: A Study of Karnataka State," Jun. 2021, doi: 10.2139/ssrn.3865604.
- [108] M. S. Khan *et al.*, "SARS-CoV-2 Seroprevalence Among Healthcare Workers by Workplace Exposure Risk in Kashmir, India.," *J. Hosp. Med.*, vol. 16, no. 5, pp. 274–281, May 2021, doi: 10.12788/jhm.3609.
- [109] A. Kumar, D. Sathyapalan, A. Ramachandran, K. Subhash, L. Biswas, and K. V. Beena, "SARS-CoV-2 antibodies in healthcare workers in a large university hospital, Kerala, India.," *Clin. Microbiol. Infect. Off. Publ. Eur. Soc. Clin. Microbiol. Infect. Dis.*, vol. 27, no. 3, pp. 481–483, Mar. 2021, doi: 10.1016/j.cmi.2020.09.013.

- [110] H. Kaur, R. Singh, K. Singh, S. Kaur, M. Jairath, and S. K. Sidhu, "Pervasiveness and epidemiological profile of SARS-CoV-2 infection among the population of Majha Region of Punjab, India," *J. Clin. Diagn. Res.*, vol. 15, no. 6, pp. KC01–KC05, 2021, doi: 10.7860/JCDR/2021/48749.15000.
- [111] M. Goenka *et al.*, "Seroprevalence of COVID-19 Amongst Health Care Workers in a Tertiary Care Hospital of a Metropolitan City from India.," *J. Assoc. Physicians India*, vol. 68, no. 11, pp. 14–19, Nov. 2020.
- [112] N. Kumar, S. Bhartiya, S. Desai, A. Mutha, A. Beldar, and T. Singh, "Seroprevalence of Antibodies Against SARS-CoV-2 Among Health Care Workers in Mumbai, India.," *Asia. Pac. J. Public Health*, vol. 33, no. 1, pp. 126–128, Jan. 2021, doi: 10.1177/1010539520977307.
- [113] N. N. Mahajan *et al.*, "Prevalence and Clinical Presentation of COVID-19 among Healthcare Workers at a Dedicated Hospital in India.," *J. Assoc. Physicians India*, vol. 68, no. 12, pp. 16–21, Dec. 2020.
- [114] N. Mahajan *et al.*, "Prevalence, Clinical Characteristics, Virus Clearance and Treatment Outcomes of SARS-CoV-2 Infection in Healthcare Workers in India," Oct. 2020, doi: 10.2139/ssrn.3706581.
- [115] T. Singhal, S. Shah, R. Naik, A. Kazi, and P. Thakkar, "Prevalence of COVID-19 antibodies in healthcare workers at the peak of the pandemic in Mumbai, India: A preliminary study.," *Indian J. Med. Microbiol.*, vol. 38, no. 3 & 4, pp. 461–463, Dec. 2020, doi: 10.4103/ijmm.IJMM\_20\_308.
- [116] J. Tanna *et al.*, "Incidence and Epidemiological study of COVID-19 in Nagpur urban region (India) using Molecular testing," *medRxiv*, p. 2021.05.11.21256719, May 2021, doi: 10.1101/2021.05.11.21256719.
- [117] N. Sharma *et al.*, "The seroprevalence and trends of SARS-CoV-2 in Delhi, India: A repeated population-based seroepidemiological study," *medRxiv*, p. 2020.12.13.20248123, Dec. 2020, doi: 10.1101/2020.12.13.20248123.
- [118] R. Gupta *et al.*, "Seroprevalence of antibodies to SARS-CoV-2 in healthcare workers & implications of infection control practice in India.," *Indian J. Med. Res.*, vol. 153, no. 1 & 2, pp. 207–213, Feb. 2021, doi: 10.4103/ijmr.IJMR\_3911\_20.
- [119] S. M. S. Khan *et al.*, "Seroprevalence of SARS-CoV-2 specific IgG antibodies in District Srinagar, northern India - A cross-sectional study.," *PloS One*, vol. 15, no. 11, p. e0239303, 2020, doi: 10.1371/journal.pone.0239303.
- [120] P. S. Satpati *et al.*, "Sero-surveillance (IgG) of SARS-CoV-2 among Asymptomatic General population of Paschim Medinipur, West Bengal, India," *medRxiv*, p. 2020.09.12.20193219, Sep. 2020, doi: 10.1101/2020.09.12.20193219.
- [121] M. Mahto, A. Banerjee, B. Biswas, S. Kumar, N. Agarwal, and P. K. Singh, "Seroprevalence of IgG against SARS-CoV-2 and its determinants among healthcare workers of a COVID-19 dedicated hospital of India.," *Am. J. Blood Res.*, vol. 11, no. 1, pp. 44–52, 2021.
- [122] P. Bogam *et al.*, "Burden of COVID-19 and Case Fatality Rate in Pune India: An Analysis of First and Second Wave of the Pandemic," *medRxiv*, p. 2021.06.21.21259225, Jun. 2021, doi: 10.1101/2021.06.21.21259225.
- [123] A. Ghose *et al.*, "Community prevalence of antibodies to SARS-CoV-2 and correlates of protective immunity in five localities in an Indian metropolitan city," *medRxiv*, p. 2020.11.17.20228155, Nov. 2020, doi: 10.1101/2020.11.17.20228155.
- [124] J. Monteiro *et al.*, "Into the thirteenth Month: A Case Study on the Outbreak Analytics and Modeling the spread of SARS-CoV-2 Infection in Pune City, India," *medRxiv*, p. 2021.06.22.21259295, Jun. 2021, doi: 10.1101/2021.06.22.21259295.

- [125] S. Sharma, K. Goel, K. K. Kurup, G. S. Grover, and R. Bhaskar, "COVID-19 in Punjab, India: Epidemiological patterns, laboratory surveillance and contact tracing of COVID-19 cases, March-May 2020.," *Clin. Epidemiol. Glob. Health*, vol. 11, p. 100769, Sep. 2021, doi: 10.1016/j.cegh.2021.100769.
- [126] K. S. Vignesh, V. N. Indhiya Selvan, K. Kosalram, and A. Abarajitha, "A spatial exploratory study on COVID-19 disaster - current outbreak in Tamil Nadu, India," *Turk. J. Physiother. Rehabil.*, vol. 32, no. 3, pp. 5332–5341, 2021.
- [127] R. Laxminarayan *et al.*, "Epidemiology and transmission dynamics of COVID-19 in two Indian states," *Science*, vol. 370, no. 6517, pp. 691–697, Nov. 2020, doi: 10.1126/science.abd7672.
- [128] J. Panchamia, B. Bhagat, V. Bharati, A. Joshi, and D. Mavalankar, "Low COVID-19 mortality in old age homes in western India: an empirical study," *medRxiv*, p. 2020.12.08.20245134, Dec. 2020, doi: 10.1101/2020.12.08.20245134.
- [129] A. Suresh and G. N. Srivastava, "Clinicodemographic profile and outcomes of severe COVID-19 infection in young adults," *Indian J. Crit. Care Med.*, pp. S69–S69, 2021.
- [130] S. Banerjee, A. Guha, A. Das, M. Nandi, and R. Mondal, "A Preliminary Report of COVID-19 in Children in India.," *Indian Pediatr.*, vol. 57, no. 10, pp. 963–964, Oct. 2020, doi: 10.1007/s13312-020-2004-6.
- [131] B. B. Basnet *et al.*, "A Year Trend Analysis and Spatial Distribution of COVID-19 Cases in Nepal.," *Asia. Pac. J. Public Health*, p. 10105395211012232, May 2021, doi: 10.1177/10105395211012233.
- [132] M. L. Dhimal *et al.*, "Age and Gender Differences in COVID 19 Morbidity and Mortality in Nepal.," *Kathmandu Univ. Med. J. KUMJ*, vol. 18, no. 72, pp. 329–332, Dec. 2020.
- [133] K. P. Pathak, "COVID-19 in Nepal: Lower Than Expected Incidence and Mortality.," *Asia. Pac. J. Public Health*, vol. 32, no. 6–7, p. 366, Oct. 2020, doi: 10.1177/1010539520940884.
- [134] A. K. Sharma *et al.*, "Epidemiological and clinical profile of covid-19 in nepali children: An initial experience," *J. Nepal Paediatr. Soc.*, vol. 40, no. 3, pp. 202–209, 2020, doi: 10.3126/jnps.v40i3.32438.
- [135] S. Abbas, A. Raza, A. Iftikhar, A. Khan, S. Khan, and M. A. Yusuf, "Seroprevalence of SARS-CoV-2 Antibodies Among Health Care Personnel at a Health Care System in Pakistan.," *Asia. Pac. J. Public Health*, p. 10105395211011010, Apr. 2021, doi: 10.1177/10105395211011010.
- [136] A. Chaudhry *et al.*, "Mortality Analysis of COVID-19 Confirmed Cases in Pakistan," Jun. 2020, doi: 10.1101/2020.06.07.20121939.
- [137] R. ud Din and E. A. Algehyne, "Mathematical analysis of COVID-19 by using SIR model with convex incidence rate," *Results Phys.*, vol. 23, p. 103970, Apr. 2021, doi: 10.1016/j.rinp.2021.103970.
- [138] O. J. Peter, S. Qureshi, A. Yusuf, M. Al-Shomrani, and A. A. Idowu, "A new mathematical model of COVID-19 using real data from Pakistan," *Results Phys.*, vol. 24, p. 104098, May 2021, doi: 10.1016/j.rinp.2021.104098.
- [139] M. Waqar, B. Wahid, M. Idrees, M. Ali, and Z. Rehman, "Seroprevalence of SARS-CoV-2 in Pakistan: an update on epidemiological trends.," *Z. Naturforschung C J. Biosci.*, Jun. 2021, doi: 10.1515/znc-2020-0291.
- [140] S. Zaidi *et al.*, "Seroprevalence of anti-SARS-CoV-2 antibodies in residents of Karachi-challenges in acquiring herd immunity for COVID 19.," *J. Public Health Oxf. Engl.*, vol. 43, no. 1, pp. 3–8, Apr. 2021, doi: 10.1093/pubmed/fdaa170.
- [141] I. Naiyar, A. F. Anjum, A. M. Khalid, I. Noor, M. S. Abdullah, and M. Z. Anwar, "Seroprevalence of COVID-19 and associated factors in a medical institution in Pakistan.," *J. Taibah Univ. Med. Sci.*, May 2021, doi: 10.1016/j.jtumed.2021.04.004.

- [142] A. Younas, S. Waheed, S. Khawaja, M. Imam, M. Borhany, and T. Shamsi, "Seroprevalence of SARS-CoV-2 antibodies among healthy blood donors in Karachi, Pakistan.," *Transfus. Apher. Sci. Off. J. World Apher. Assoc. Off. J. Eur. Soc. Haemapheresis*, vol. 59, no. 6, p. 102923, Dec. 2020, doi: 10.1016/j.transci.2020.102923.
- [143] S. Ali, N. Muhammad, J. Afridi, T. Mehar, N. Mehmood, and Ziauddin, "IgM and IgG antibodies status in suspected patients of Covid-19 in Khyber Pakhtunkhwa, Pakistan," *Med. Forum Mon.*, vol. 32, no. 4, pp. 120–123, 2021.
- [144] M. Haq *et al.*, "Seroprevalence and Risk Factors of SARS CoV-2 in Health Care Workers of Tertiary-Care Hospitals in the Province of Khyber Pakhtunkhwa, Pakistan," Sep. 2020, doi: 10.1101/2020.09.29.20203125.
- [145] W. Javed, J. B. Baqar, S. H. B. Abidi, and W. Farooq, "Sero-prevalence Findings from Metropolises in Pakistan: Implications for Assessing COVID-19 Prevalence and Case-fatality within a Dense, Urban Working Population," *medRxiv*, p. 2020.08.13.20173914, Aug. 2020, doi: 10.1101/2020.08.13.20173914.
- [146] M. Nisar, Y. Yousafzai, N. Saba, U. Waheed, and M. Khalid, "Seroprevalence of SARS-CoV-2 in blood donors during the second wave of COVID-19 pandemic in Peshawar, Pakistan," *Vox Sang.*, vol. 116, no. SUPPL 1, pp. 146–147, 2021, doi: 10.1111/vox.13117.
- [147] C. Jeewandara *et al.*, "Seroprevalence of SARS-CoV-2 infection in the Colombo Municipality region, Sri Lanka," *medRxiv*, p. 2021.06.18.21259143, Jun. 2021, doi: 10.1101/2021.06.18.21259143.
- [148] A. T. Levin, W. P. Hanage, N. Owusu-Boaitey, K. B. Cochran, S. P. Walsh, and G. Meyerowitz-Katz, "Assessing the age specificity of infection fatality rates for COVID-19: systematic review, meta-analysis, and public policy implications," *Eur. J. Epidemiol.*, vol. 35, no. 12, pp. 1123–1138, 2020, doi: 10.1007/s10654-020-00698-1.
